# Supplementary material for: Effect of developmental NMDAR antagonism with CGP 39551 on aspartame-induced hypothalamic and adrenal gene expression
Source: PubMed Central journal article supplement (PMC5862471; doi:10.1371/journal.pone.0194416), 2018-03-21
Supplement: pone.0194416.s001.pdf [file pone.0194416.s001.pdf]

**S1 Table: Taqman assay IDs and their corresponding Affymetrix probeset IDs**

| <b>Gene symbol</b> | <b>Gene name</b>                                                         | <b>Taqman assay ID</b> | <b>Affymetrix Probeset ID</b> | <b>Sample</b>          |
|--------------------|--------------------------------------------------------------------------|------------------------|-------------------------------|------------------------|
| <i>Actb</i>        | Actin Beta                                                               | Mm00607939_s1          | 10535381                      | Control                |
| <i>Apoa4</i>       | Apolipoprotein A-IV                                                      | Mm00431814_m1          | 10585010                      | Adrenal                |
| <i>Atg5</i>        | Autophagy related 5                                                      | Mm01187303_m1          | 10362922                      | Adrenal                |
| <i>Chrn2</i>       | Cholinergic receptor, nicotinic, beta polypeptide 2                      | Mm00515323_m1          | 10499643                      | Adrenal                |
| <i>Cyp7a1</i>      | Cytochrome P450, family 7, subfamily a, polypeptide 1                    | Mm00484150_m1          | 10511375                      | Adrenal                |
| <i>Gabra1</i>      | Gamma-aminobutyric acid (GABA) A receptor, subunit alpha 1               | Mm00439046_m1          | 10385297                      | Adrenal                |
| <i>Gapdh</i>       | Glyceraldehyde-3-phosphate dehydrogenase                                 | Mm99999915_g1          | 10480032                      | Control                |
| <i>Gria1</i>       | Glutamate receptor, ionotropic, AMPA1 (alpha 1)                          | Mm00433753_m1          | 10376245                      | Adrenal                |
| <i>Lamp5</i>       | Lysosomal-associated membrane protein family, member 5                   | Mm00512854_m1          | 10476482                      | Hypothalamus           |
| <i>Pomc</i>        | Pro-opiomelanocortin-alpha                                               | Mm00435874_m1          | 10394240                      | Hypothalamus           |
| <i>Ppargc1a</i>    | Peroxisome proliferative activated receptor, gamma, coactivator 1 alpha  | Mm01208835_m1          | 10529977                      | Adrenal                |
| <i>Slc6a3</i>      | Solute carrier family 6 member 3(nuerotransmitter transporter, dopamine) | Mm00438388_m1          | 10406050                      | Adrenal                |
| <i>Slc6a5</i>      | Solute carrier family 6 member 5(nuerotransmitter transporter, glycine)  | Mm01202538_m1          | 10553430                      | Adrenal & Hypothalamus |
| <i>Srd5a2</i>      | Steroid 5 alpha-reductase 2                                              | Mm00446421_m1          | 10452854                      | Hypothalamus           |
| <i>Star</i>        | Steroidogenic acute regulatory protein                                   | Mm00441558_m1          | 10571054                      | Adrenal                |
