# Supplementary material for: Effect of developmental NMDAR antagonism with CGP 39551 on aspartame-induced hypothalamic and adrenal gene expression
Source: PubMed Central journal article supplement (PMC5862471; doi:10.1371/journal.pone.0194416), 2018-03-21
Supplement: pone.0194416.s002.pdf [file pone.0194416.s002.pdf]

**S2 Table: Differential changes in hypothalamic gene expression in ASP+ CGP treated mice relative to ASP diet mice ( $\geq \pm 1.4$  fold change,  $p < 0.05$ ).**

| <i>Gene Symbol</i> | <i>Gene name</i>                                        | <i>RefSeq</i> | <i>P-value</i> | <i>Fold change</i> |
|--------------------|---------------------------------------------------------|---------------|----------------|--------------------|
| Abcb1b             | ATP-binding cassette, sub-family B (MDR TAP), member 1B | NM_011075     | 2.97E-09       | 4.36               |
| Abhd2              | abhydrolase domain containing 2                         | NM_018811     | 2.33E-07       | 1.59               |
| Acaa2              | acetyl-Coenzyme A acyltransferase 2                     | NM_177470     | 2.03E-06       | 1.51               |
| Acacb              | Acetyl-Coenzyme A carboxylase bet                       | NM_133904     | 1.27E-06       | 1.41               |
| Acsf2              | Acyl-CoA synthetase family member 2                     | NM_153807     | 7.25E-05       | 1.40               |
| Acs1               | acyl-CoA synthetase long-chain family member 1          | NM_007981     | 8.78E-09       | 1.58               |
| Acsm3              | acyl-CoA synthetase medium-chain family member 3        | NM_016870     | 7.14E-05       | 1.59               |
| Adh1               | Alcohol dehydrogenase 1 (class I)                       | NM_007409     | 1.02E-11       | 11.59              |
| Adig               | adipogenin                                              | NM_145635     | 4.94E-08       | 2.27               |
| Adipoq             | adiponectin, C1Q and collagen domain containing         | NM_009605     | 6.40E-09       | 5.12               |
| Aebp1              | AE binding protein 1                                    | NM_001291857  | 7.61E-08       | 1.47               |
| Agpat2             | 1-acylglycerol-3-phosphate O-acyltransferase 2          | NM_026212     | 1.30E-08       | 2.72               |
| Agtr1a             | angiotensin II receptor, type 1a                        | NM_177322     | 7.19E-10       | 5.01               |
| Akr1b7             | Aldo-keto reductase family 1, member B7                 | NM_009731     | 4.03E-12       | 32.76              |
| Akr1b8             | aldo-keto reductase family 1, member B8                 | NM_008012     | 6.80E-10       | 3.00               |
| Akr1c1             | aldo-keto reductase family 1, member C-like             | NM_027582     | 1.12E-07       | 6.01               |
| Alas1              | aminolevulinic acid synthase 1                          | NM_001291835  | 4.07E-07       | 1.57               |
| Alb                | albumin                                                 | NM_009654     | 4.34E-05       | 1.78               |
| Amy2a5             | Amylase 2a5                                             | NM_001042711  | 9.15E-15       | 14.12              |
| Antxr2             | anthrax toxin receptor 2                                | NM_133738     | 1.99E-06       | 1.67               |
| Aoc3               | amine oxidase, copper containing 3                      | NM_009675     | 4.46E-07       | 1.58               |
| Aqp1               | aquaporin 1                                             | NM_007472     | 0.001199       | 1.44               |
| Aqp7               | aquaporin 7                                             | NM_007473     | 4.30E-05       | 2.14               |
| Ascl1              | achaete-scute complex homolog 1 (Drosophila)            | NM_008553     | 0.000337       | 1.50               |
| Bgn                | biglycan                                                | NM_007542     | 3.49E-08       | 1.99               |
| C1rb               | complement component 1, r subcomponent B                | NM_001113356  | 7.30E-06       | 1.93               |
| C2                 | Complement component 2 (within H-2S)                    | NM_013484     | 0.000329       | 1.42               |
| C3                 | complement component 3                                  | NM_009778     | 5.00E-08       | 1.94               |
| C7                 | complement component 7                                  | NM_001243837  | 7.29E-07       | 1.94               |
| Car3               | Carbonic anhydrase 3                                    | NM_007606     | 7.29E-12       | 19.70              |
| Car5b              | carbonic anhydrase 5b, mitochondrial                    | NM_181315     | 4.85E-06       | 1.69               |
| Casp8              | caspase 8                                               | NM_001080126  | 5.52E-06       | 1.43               |
| Cbln3              | Cerebellin 3 precursor protein                          | NM_019820     | 0.000136       | -1.80              |
| Ccnd2              | cyclin D2                                               | NM_009829     | 7.24E-08       | 1.84               |
| Cd151              | CD151 antigen                                           | NM_001111049  | 4.67E-06       | 1.48               |
| Cd36               | CD36 antigen                                            | NM_001159555  | 8.70E-10       | 7.26               |
| Cd74               | CD74 antigen                                            | NM_001042605  | 3.54E-10       | 3.35               |
| Cel                | carboxyl ester lipase                                   | NM_009885     | 4.44E-06       | 2.07               |
| Cela2a             | chymotrypsin-like elastase family, member 2A            | NM_007919     | 1.34E-05       | 2.02               |
| Cela3b             | chymotrypsin-like elastase family, member 3B            | NM_026419     | 0.000102       | 2.20               |
| Ces1d              | carboxylesterase 1D                                     | NM_053200     | 1.07E-07       | 3.84               |
| Ces1f              | carboxylesterase 1F                                     | NM_144930     | 5.34E-05       | 1.42               |

**S2 Table: Differential changes in hypothalamic gene expression in ASP+ CGP treated mice relative to ASP diet mice ( $\geq\pm 1.4$  fold change,  $p < 0.05$ ).**

| <i>Gene Symbol</i> | <i>Gene name</i>                                                    | <i>RefSeq</i> | <i>P-value</i> | <i>Fold change</i> |
|--------------------|---------------------------------------------------------------------|---------------|----------------|--------------------|
| Cfd                | complement factor D (adipsin)                                       | NM_001291915  | 1.75E-07       | 2.35               |
| Cfh                | complement component factor h                                       | NM_009888     | 1.89E-05       | 1.77               |
| Cga                | Glycoprotein hormones, alpha subunit                                | NM_009889     | 4.65E-09       | 9.72               |
| Cidea              | cell death-inducing DNA fragmentation factor, $\alpha$ subunit-like | NM_007702     | 6.39E-07       | 2.06               |
| Cidec              | cell death-inducing DFFA-like effector c                            | NM_178373     | 3.17E-11       | 6.09               |
| Cldn9              | claudin 9                                                           | NM_020293     | 7.03E-05       | 1.51               |
| Clic1              | chloride intracellular channel 1                                    | NM_033444     | 6.80E-05       | 1.49               |
| Clps               | colipase, pancreatic                                                | NM_025469     | 8.01E-10       | 3.37               |
| Cobll1             | Cobl-like 1                                                         | NM_027225     | 1.05E-06       | 1.62               |
| Cox8b              | cytochrome c oxidase subunit VIIIb                                  | NM_007751     | 2.25E-10       | 3.76               |
| Cpa1               | carboxypeptidase A1, pancreatic                                     | NM_025350     | 2.70E-10       | 6.19               |
| Cpa2               | carboxypeptidase A2, pancreatic                                     | NM_001024698  | 2.38E-05       | 1.63               |
| Cpb1               | carboxypeptidase B1 (tissue)                                        | NM_029706     | 1.36E-10       | 5.28               |
| Cpt1b              | carnitine palmitoyltransferase 1b, muscle                           | NM_009948     | 9.09E-06       | 1.79               |
| Creb3l2            | cAMP responsive element binding protein 3-like 2                    | NM_178661     | 8.11E-07       | 1.44               |
| Ctrb1              | Chymotrypsinogen B1                                                 | NM_025583     | 3.12E-10       | 8.64               |
| Ctrl               | chymotrypsin-like                                                   | NM_023182     | 2.17E-07       | 2.04               |
| Ctsh               | cathepsin H                                                         | NM_007801     | 4.56E-05       | 1.49               |
| Cxcr4              | chemokine (C-X-C motif) receptor 4                                  | NM_009911     | 2.54E-05       | 1.47               |
| Cybb               | cytochrome b-245, beta polypeptide                                  | NM_007807     | 9.01E-06       | 1.47               |
| Cyp11a1            | Cytochrome P450, family 11, subfamily a, polypeptide 1              | NM_019779     | 2.27E-11       | 27.43              |
| Cyp11b1            | Cytochrome P450, family 11, subfamily b, polypeptide 1              | NM_001033229  | 1.62E-13       | 60.83              |
| Cyp11b2            | cytochrome P450, family 11, subfamily b, polypeptide 2              | NM_009991     | 5.25E-07       | 2.79               |
| Cyp1b1             | cytochrome P450, family 1, subfamily b, polypeptide 1               | NM_009994     | 1.13E-05       | 1.52               |
| Cyp21a1            | Cytochrome P450, family 21, subfamily a, polypeptide 1              | NM_009995     | 9.49E-12       | 53.13              |
| Cyp2e1             | Cytochrome P450, family 2, subfamily e, polypeptide 1               | NM_021282     | 1.04E-11       | 13.27              |
| Cyp2f2             | cytochrome P450, family 2, subfamily f, polypeptide 2               | NM_007817     | 8.14E-09       | 2.49               |
| Dab2               | disabled 2, mitogen-responsive phosphoprotein                       | NM_001008702  | 1.12E-08       | 1.97               |
| Dap                | Death-associated protein                                            | NM_146057     | 1.90E-05       | 1.40               |
| Dapl1              | death associated protein-like 1                                     | NM_029723     | 1.72E-05       | 1.67               |
| Dbh                | Dopamine beta hydroxylase                                           | NM_138942     | 6.28E-10       | 7.14               |
| Dcn                | decorin                                                             | NM_001190451  | 3.72E-07       | 1.77               |
| Dhcr7              | 7-dehydrocholesterol reductase                                      | NM_007856     | 3.67E-07       | 1.52               |
| Dmbt1              | deleted in malignant brain tumors 1                                 | NM_007769     | 2.62E-05       | 1.57               |
| Dpep1              | dipeptidase 1 (renal)                                               | NM_007876     | 5.98E-07       | 2.49               |
| Ecm1               | extracellular matrix protein 1                                      | NM_001252653  | 8.91E-09       | 2.42               |
| Ehhadh             | enoyl-Coenzyme A, hydratase 3-hydroxyacyl dehydrogenase             | NM_023737     | 0.000296       | 1.47               |
| Elovl3             | elongation of very long chain fatty acids                           | NM_007703     | 8.92E-05       | 1.45               |
| Emcn               | endomucin                                                           | NM_001163522  | 0.00072        | 1.47               |
| Emp3               | epithelial membrane protein 3                                       | NM_001146346  | 4.64E-09       | 4.41               |
| Epcam              | epithelial cell adhesion molecule                                   | NM_008532     | 1.80E-07       | 2.67               |
| Ephx1              | Epoxide hydrolase 1, microsomal                                     | NM_010145     | 1.60E-05       | 1.41               |
| Ern1               | endoplasmic reticulum (ER) to nucleus signalling 1                  | NM_023913     | 1.14E-08       | 1.45               |

**S2 Table: Differential changes in hypothalamic gene expression in ASP+ CGP treated mice relative to ASP diet mice ( $\geq \pm 1.4$  fold change,  $p < 0.05$ ).**

| <i>Gene Symbol</i> | <i>Gene name</i>                                                  | <i>RefSeq</i> | <i>P-value</i> | <i>Fold change</i> |
|--------------------|-------------------------------------------------------------------|---------------|----------------|--------------------|
| Fabp4              | Fatty acid binding protein 4, adipocyte                           | BC002148      | 1.24E-10       | 16.17              |
| Fam129a            | family with sequence similarity 129, member A                     | NM_022018     | 4.09E-06       | 1.87               |
| Fdx1               | ferredoxin 1                                                      | NM_007996     | 4.40E-08       | 2.32               |
| Fdxr               | ferredoxin reductase                                              | NM_007997     | 5.86E-08       | 1.57               |
| Fetub              | fetuin beta                                                       | NM_001083904  | 7.61E-05       | 1.49               |
| Figf               | c-fos induced growth factor                                       | NM_010216     | 4.73E-06       | 1.63               |
| Fshb               | follicle stimulating hormone beta                                 | NM_008045     | 1.30E-08       | 3.21               |
| Gabra6             | Gamma-aminobutyric acid (GABA) A receptor, subunit alpha 6        | NM_001099641  | 0.000193       | -1.58              |
| Gadd45b            | Growth arrest and DNA-damage-inducible 45 beta                    | NM_008655     | 1.65E-06       | 1.42               |
| Gata6              | GATA binding protein 6                                            | NM_010258     | 1.14E-05       | 1.84               |
| Gh                 | Growth hormone                                                    | NM_008117     | 1.79E-14       | 8.34               |
| Ghrhr              | growth hormone releasing hormone receptor                         | NM_001003685  | 5.46E-07       | 1.88               |
| Gp49a              | glycoprotein 49 A                                                 | NM_001291892  | 0.00018        | 1.49               |
| Gpc4               | glypican 4                                                        | NM_008150     | 2.26E-07       | 1.68               |
| Gpnmb              | glycoprotein (transmembrane) nmb                                  | NM_053110     | 7.64E-05       | 1.57               |
| Greb1              | gene regulated by estrogen in breast cancer protein               | NM_001252071  | 2.56E-07       | 1.66               |
| Gstm2              | Glutathione S-transferase, mu 2                                   | NM_008183     | 0.00083        | 1.42               |
| H2-Aa              | histocompatibility 2, class II antigen A, alpha                   | NM_010378     | 1.56E-09       | 3.55               |
| H2-Ab1             | histocompatibility 2, class II antigen A, beta 1                  | NM_207105     | 2.45E-08       | 2.85               |
| H2-Eb1             | histocompatibility 2, class II antigen E beta                     | NM_010382     | 0.000275       | 1.57               |
| H2-K1              | histocompatibility 2, K1, K region                                | NM_001001892  | 2.80E-07       | 1.78               |
| H2-Q4              | histocompatibility 2, Q region locus 4                            | NM_001143689  | 0.000429       | 1.43               |
| H2-Q7              | histocompatibility 2, Q region locus 7                            | NM_001198560  | 7.55E-05       | 1.53               |
| Hadh               | hydroxyacyl-Coenzyme A dehydrogenase                              | NM_008212     | 9.69E-07       | 1.45               |
| Hao2               | hydroxyacid oxidase 2                                             | NM_019545     | 2.42E-06       | 2.15               |
| Hmox1              | heme oxygenase (decycling) 1                                      | NM_010442     | 1.32E-06       | 1.63               |
| Hoxb9              | homeobox B9                                                       | NM_008270     | 3.25E-06       | 1.69               |
| Hoxc8              | homeobox C8                                                       | NM_010466     | 9.80E-07       | 1.73               |
| Hp                 | haptoglobin                                                       | NM_017370     | 1.46E-05       | 1.72               |
| Hsd3b1             | Hydroxy-delta-5-steroid dehydrogenase,3 beta and steroid $\delta$ | NM_008293     | 3.43E-11       | 28.80              |
| Hsd3b6             | hydroxy-delta-5-steroid dehydrogenase,3 beta and steroid $\delta$ | NM_013821     | 1.49E-06       | 2.93               |
| Hspb1              | heat shock protein 1                                              | NM_013560     | 5.90E-06       | 1.48               |
| Hspg2              | perlecan (heparan sulfate proteoglycan 2)                         | NM_008305     | 1.99E-07       | 1.51               |
| Ifi27              | interferon, alpha-inducible protein 27                            | NM_026790     | 3.22E-06       | 1.54               |
| Ifi27l2a           | interferon, alpha-inducible protein 27 like 2A                    | NM_029803     | 7.14E-05       | 1.72               |
| Ifitm2             | interferon induced transmembrane protein 2                        | NM_030694     | 1.38E-05       | 2.44               |
| Ifitm3             | interferon induced transmembrane protein 3                        | NM_025378     | 0.000115       | 1.60               |
| Igfbp7             | insulin-like growth factor binding protein 7                      | NM_001159518  | 4.36E-09       | 1.80               |
| Il10rb             | interleukin 10 receptor, beta                                     | NM_008349     | 1.04E-05       | 1.54               |
| Inmt               | indolethylamine N-methyltransferase                               | NM_009349     | 5.05E-07       | 2.39               |
| Isg20              | interferon-stimulated protein                                     | NM_001291220  | 3.97E-05       | 1.52               |
| Kcnk3              | potassium channel, subfamily K, member 3                          | NM_010608     | 1.02E-07       | 1.90               |
| Kdr                | kinase insert domain protein receptor                             | NM_010612     | 1.32E-06       | 1.48               |

**S2 Table: Differential changes in hypothalamic gene expression in ASP+ CGP treated mice relative to ASP diet mice ( $\geq \pm 1.4$  fold change,  $p < 0.05$ ).**

| <i>Gene Symbol</i> | <i>Gene name</i>                                   | <i>RefSeq</i> | <i>P-value</i> | <i>Fold change</i> |
|--------------------|----------------------------------------------------|---------------|----------------|--------------------|
| Klhdc8a            | kelch domain containing 8A                         | NM_144810     | 1.48E-05       | 1.47               |
| Lcn2               | lipocalin 2                                        | NM_008491     | 3.60E-07       | 1.86               |
| Lgals1             | lectin, galactose binding, soluble 1               | NM_008495     | 1.82E-05       | 1.96               |
| Lgals12            | lectin, galactose binding, soluble 12              | NM_019516     | 0.000133       | 1.43               |
| Lhb                | luteinizing hormone beta                           | NM_008497     | 6.22E-08       | 5.44               |
| Lipe               | lipase, hormone sensitive                          | NM_001039507  | 7.22E-07       | 1.62               |
| Lpl                | lipoprotein lipase                                 | NM_008509     | 4.78E-11       | 3.45               |
| Lrg1               | leucine-rich alpha-2-glycoprotein 1                | NM_029796     | 7.33E-06       | 1.74               |
| Ly6d               | Lymphocyte antigen 6 complex, locus D              | NM_010742     | 1.79E-09       | 9.71               |
| Lyz2               | lysozyme 2                                         | NM_017372     | 9.60E-05       | 1.78               |
| Man2a1             | mannosidase 2, alpha 1                             | NM_008549     | 9.91E-06       | 1.53               |
| Mc2r               | Melanocortin 2 receptor                            | NM_001271716  | 7.14E-09       | 13.38              |
| Me1                | malic enzyme 1, NADP(+)-dependent, cytosolic       | NM_001198933  | 5.10E-09       | 1.71               |
| Mgap               | Mitochondria localized glutamic acid rich protein  | NM_026358     | 4.64E-12       | 10.62              |
| Mmp19              | matrix metalloproteinase 19                        | NM_001164197  | 0.000223       | 1.46               |
| Mrap               | melanocortin 2 receptor accessory protein          | NM_029844     | 3.09E-10       | 4.68               |
| Mup10              | major urinary protein 10                           | NM_001122647  | 9.31E-08       | 2.72               |
| Mup2               | major urinary protein 2                            | NM_001045550  | 3.44E-07       | 3.00               |
| Myo9a              | Myosin IXa                                         | NM_173018     | 8.66E-05       | -1.44              |
| Nid1               | nidogen 1                                          | NM_010917     | 7.01E-07       | 1.46               |
| Npr1               | natriuretic peptide receptor 1                     | NM_008727     | 7.76E-07       | 2.21               |
| Npy                | neuropeptide Y                                     | NM_023456     | 1.20E-05       | 1.95               |
| Nr0b2              | nuclear receptor subfamily 0, group B, member 2    | NM_011850     | 2.63E-05       | 2.12               |
| Nr4a1              | nuclear receptor subfamily 4, group A, member 1    | NM_010444     | 0.000157       | 1.53               |
| Nr5a1              | nuclear receptor subfamily 5, group A, member 1    | NM_139051     | 2.49E-07       | 1.64               |
| Oacyl              | O-acyltransferase like                             | NM_177028     | 4.47E-08       | 1.91               |
| Ogn                | osteoglycin                                        | NM_008760     | 0.000204       | 1.52               |
| Osgin1             | oxidative stress induced growth inhibitor 1        | NM_027950     | 0.000106       | 1.45               |
| Pck1               | phosphoenolpyruvate carboxykinase 1, cytosolic     | NM_011044     | 8.28E-12       | 2.97               |
| Pcm1               | Pericentriolar material 1                          | NM_023662     | 3.89E-05       | -1.50              |
| Pcolce             | procollagen C-endopeptidase enhancer protein       | NM_008788     | 2.23E-09       | 3.55               |
| Pdk4               | pyruvate dehydrogenase kinase, isoenzyme 4         | NM_013743     | 2.68E-07       | 1.93               |
| Plin1              | perilipin 1                                        | NM_001113471  | 1.35E-07       | 2.69               |
| Plin2              | perilipin 2                                        | NM_007408     | 4.96E-07       | 2.06               |
| Plod2              | procollagen lysine, 2-oxoglutarate 5-dioxygenase 2 | NM_001142916  | 1.15E-05       | 1.67               |
| Plp2               | proteolipid protein 2                              | NM_019755     | 0.000351       | 1.57               |
| Pnlip              | pancreatic lipase                                  | NM_026925     | 1.71E-06       | 2.00               |
| Pnliprp1           | pancreatic lipase related protein 1                | NM_018874     | 2.62E-05       | 1.96               |
| Pnmt               | Phenylethanolamine-N-methyltransferase             | NM_008890     | 1.11E-08       | 6.82               |
| Pnpla2             | patatin-like phospholipase domain containing 2     | NM_001163689  | 4.55E-08       | 1.65               |
| Pomc               | pro-opiomelanocortin-alpha                         | NM_001278581  | 8.29E-13       | 5.98               |
| Pon3               | paraoxonase 3                                      | NM_173006     | 1.42E-07       | 1.78               |
| Prl                | Prolactin                                          | NM_001163530  | 3.87E-09       | 29.82              |

**S2 Table: Differential changes in hypothalamic gene expression in ASP+ CGP treated mice relative to ASP diet mice ( $\geq \pm 1.4$  fold change,  $p < 0.05$ ).**

| <i>Gene Symbol</i> | <i>Gene name</i>                                            | <i>RefSeq</i> | <i>P-value</i> | <i>Fold change</i> |
|--------------------|-------------------------------------------------------------|---------------|----------------|--------------------|
| Prss2              | protease, serine 2                                          | NM_009430     | 1.89E-06       | 1.79               |
| Prss35             | protease, serine 35                                         | NM_178738     | 5.27E-09       | 5.17               |
| Rab25              | RAB25, member RAS oncogene family                           | NM_016899     | 2.93E-05       | 1.62               |
| Rbm47              | RNA binding motif protein 47                                | NM_001127382  | 4.75E-06       | 1.66               |
| Rbp4               | Retinol binding protein 4, plasma                           | NM_001159487  | 3.05E-05       | 1.41               |
| Rbpms              | RNA binding protein gene with multiple splicing             | NM_001042674  | 1.45E-06       | 1.62               |
| Rcn3               | reticulocalbin 3, EF-hand calcium binding domain            | NM_026555     | 0.000991       | 1.47               |
| Reg1               | regenerating islet-derived 1                                | NM_009042     | 1.22E-05       | 1.80               |
| Retn               | resistin                                                    | NM_001204959  | 6.63E-10       | 6.63               |
| Rnase1             | ribonuclease, RNase A family, 1 (pancreatic)                | NM_011271     | 2.22E-06       | 1.75               |
| S100a11            | S100 calcium binding protein A11 (calgizzarin)              | NM_016740     | 2.76E-05       | 1.55               |
| S100a5             | S100 calcium binding protein A5                             | NM_011312     | 3.08E-05       | 1.60               |
| Scarb1             | scavenger receptor class B, member 1                        | NM_001205082  | 1.46E-11       | 5.24               |
| Serping1           | serine (or cysteine) peptidase inhibitor, clade G, member 1 | NM_009776     | 1.06E-08       | 1.80               |
| Slc18a1            | solute carrier family 18 (vesicular monoamine), member 1    | NM_153054     | 8.92E-06       | 1.61               |
| Slc1a5             | solute carrier family 1 (neutral amino acid transporter)    | NM_009201     | 7.68E-08       | 1.96               |
| Slc25a24           | solute carrier family 25 (mitochondrial carrier)            | NM_172685     | 0.000366       | 1.59               |
| Slc27a3            | solute carrier family 27 (fatty acid transporter), member 3 | NM_011988     | 8.96E-08       | 1.56               |
| Slc43a3            | solute carrier family 43, member 3                          | NM_021398     | 1.01E-06       | 2.28               |
| Slc44a3            | solute carrier family 44, member 3                          | NM_145394     | 9.60E-05       | 1.62               |
| Slc6a4             | solute carrier family 6 (serotonin)                         | NM_010484     | 1.57E-05       | 1.50               |
| Soat1              | sterol O-acyltransferase 1                                  | NM_009230     | 1.35E-09       | 1.57               |
| Sod3               | superoxide dismutase 3, extracellular                       | NM_011435     | 6.62E-06       | 1.78               |
| Srd5a2             | Steroid 5 alpha-reductase 2                                 | NM_053188     | 2.09E-10       | 10.15              |
| Star               | Steroidogenic acute regulatory protein                      | NM_011485     | 9.47E-13       | 20.27              |
| Steap1             | six transmembrane epithelial antigen of the prostate 1      | NM_027399     | 3.10E-05       | 1.68               |
| Sycn               | syncollin                                                   | NM_026716     | 2.32E-07       | 2.49               |
| Tacr2              | tachykinin receptor 2                                       | NM_009314     | 2.91E-06       | 1.97               |
| Tbx19              | T-box 19                                                    | NM_032005     | 0.000447       | 1.45               |
| Tbx20              | T-box 20                                                    | NM_001205085  | 2.79E-05       | 2.19               |
| Tbx3               | T-box 3                                                     | NM_011535     | 1.61E-07       | 2.25               |
| Tgfb3              | transforming growth factor, beta receptor III               | NM_011578     | 3.45E-08       | 1.55               |
| Th                 | tyrosine hydroxylase                                        | NM_009377     | 9.42E-05       | 1.48               |
| Timp1              | tissue inhibitor of metalloproteinase 1                     | NM_001044384  | 5.89E-05       | 1.50               |
| Tinagl1            | tubulointerstitial nephritis antigen-like 1                 | NM_001168333  | 8.36E-06       | 1.55               |
| Tmem140            | Transmembrane protein 140                                   | NM_197986     | 0.000147       | 1.41               |
| Tmem159            | transmembrane protein 159                                   | NM_145586     | 2.93E-05       | 1.61               |
| Tmem176a           | transmembrane protein 176A                                  | NM_001098271  | 0.000295       | 1.49               |
| Tmem184a           | transmembrane protein 184a                                  | NM_001161548  | 5.86E-05       | 1.85               |
| Tmem45b            | transmembrane protein 45b                                   | NM_144936     | 1.26E-06       | 1.95               |
| Tnfrsf12a          | tumor necrosis factor receptor superfamily, member 12a      | NM_001161746  | 0.000103       | 1.43               |
| Tns1               | tensin 1                                                    | AK053112      | 1.11E-05       | 1.49               |
| Trim25             | tripartite motif-containing 25                              | NM_009546     | 7.46E-06       | 1.50               |

**S2 Table: Differential changes in hypothalamic gene expression in ASP+ CGP treated mice relative to ASP diet mice ( $\geq\pm 1.4$  fold change,  $p < 0.05$ ).**

| <i>Gene<br/>Symbol</i> | <i>Gene name</i>                                     | <i>RefSeq</i> | <i>P-value</i> | <i>Fold<br/>change</i> |
|------------------------|------------------------------------------------------|---------------|----------------|------------------------|
| Try5                   | trypsin 5                                            | NM_001003405  | 0.000411       | 1.87                   |
| Tshb                   | thyroid stimulating hormone, beta subunit            | NM_001165939  | 0.000155       | 1.63                   |
| Tspo                   | translocator protein                                 | NM_009775     | 3.44E-06       | 2.00                   |
| Tubb6                  | tubulin, beta 6 class V                              | NM_026473     | 5.83E-05       | 1.63                   |
| Tusc5                  | tumor suppressor candidate 5                         | NM_177709     | 1.30E-05       | 1.84                   |
| Txnip                  | thioredoxin interacting protein                      | NM_001009935  | 8.65E-09       | 1.97                   |
| Ucp1                   | uncoupling protein 1 (mitochondrial, proton carrier) | NM_009463     | 3.06E-10       | 5.98                   |
| Unc13c                 | Unc-13 homolog C (C. elegans)                        | NM_001081153  | 1.12E-06       | -1.55                  |
| Zfp36                  | zinc finger protein 36                               | NM_011756     | 0.000217       | 1.45                   |
| Zfp935                 | Zinc finger protein 935                              | NM_001136496  | 0.000875       | -1.45                  |
| Zg16                   | zymogen granule protein 16                           | NM_026918     | 2.80E-08       | 4.09                   |
