# Supplementary material for: Effect of developmental NMDAR antagonism with CGP 39551 on aspartame-induced hypothalamic and adrenal gene expression
Source: PubMed Central journal article supplement (PMC5862471; doi:10.1371/journal.pone.0194416), 2018-03-21
Supplement: pone.0194416.s003.pdf [file pone.0194416.s003.pdf]

**S3 Table: Differential changes in adrenal gene expression in ASP+CGP treated mice relative to ASP diet mice ( $\geq\pm 1.8$  fold change,  $p < 0.05$ ).**

| <i>Gene symbol</i> | <i>Gene name</i>                                                | <i>RefSeq</i> | <i>P-value</i> | <i>Fold Change</i> |
|--------------------|-----------------------------------------------------------------|---------------|----------------|--------------------|
| Abat               | 4-aminobutyrate aminotransferase                                | NM_001170978  | 2.74E-08       | 2.09               |
| Abca2              | ATP-binding cassette, sub-family A (ABC1), member 2             | NM_007379     | 1.48E-09       | 2.17               |
| Abhd8              | abhydrolase domain containing 8                                 | NM_022419     | 1.88E-06       | 1.84               |
| Ache               | acetylcholinesterase                                            | NM_001290010  | 1.35E-09       | 2.84               |
| Ackr1              | atypical chemokine receptor 1 (Duffy blood group)               | NM_010045     | 2.16E-07       | 2.67               |
| Acot7              | acyl-CoA thioesterase 7                                         | NM_001146057  | 4.80E-10       | 2.74               |
| Acsf6              | acyl-CoA synthetase long-chain family member 6                  | NM_001033597  | 7.09E-08       | 2.72               |
| Actr3b             | ARP3 actin-related protein 3B                                   | NM_001004365  | 2.30E-06       | 2.05               |
| Acvr1b             | activin A receptor, type 1B                                     | NM_007395     | 1.47E-05       | 1.99               |
| Adam22             | a disintegrin and metallopeptidase domain 22                    | NM_001007220  | 2.48E-08       | 3.07               |
| Adam23             | a disintegrin and metallopeptidase domain 23                    | NM_001177600  | 1.23E-08       | 2.09               |
| Adap1              | ArfGAP with dual PH domains 1                                   | NM_172723     | 1.56E-08       | 3.53               |
| Adar               | adenosine deaminase, RNA-specific                               | NM_001038587  | 3.20E-07       | 1.85               |
| Adcy1              | adenylate cyclase 1                                             | NM_009622     | 2.82E-05       | 1.81               |
| Adcy2              | adenylate cyclase 2                                             | NM_153534     | 7.07E-07       | 4.37               |
| Adcy5              | adenylate cyclase 5                                             | NM_001012765  | 5.97E-08       | 2.88               |
| Adcy8              | adenylate cyclase 8                                             | NM_001291903  | 4.76E-07       | 2.71               |
| Adcyap1            | adenylate cyclase activating polypeptide 1                      | NM_009625     | 5.93E-07       | 3.81               |
| Add2               | adducin 2 (beta)                                                | NM_001271860  | 9.28E-05       | 1.88               |
| Add3               | adducin 3 (gamma)                                               | NM_001164099  | 2.88E-07       | 1.81               |
| Aff2               | AF4 FMR2 family, member 2                                       | NM_008032     | 5.20E-06       | 2.24               |
| Aff3               | AF4 FMR2 family, member 3                                       | NM_001290814  | 3.81E-07       | 2.07               |
| Agap2              | ArfGAP with GTPase domain, ankyrin repeat and PH domain 2       | NM_001033263  | 4.09E-11       | 5.01               |
| Agbl4              | ATP GTP binding protein-like 4                                  | NM_001048189  | 2.25E-05       | 2.13               |
| Agt                | angiotensinogen (serpin peptidase inhibitor, member 8)          | NM_007428     | 2.46E-11       | 6.86               |
| Agtppb1            | ATP GTP binding protein 1                                       | NM_001048008  | 1.28E-07       | 2.40               |
| Ahi1               | Abelson helper integration site 1                               | NM_026203     | 2.70E-09       | 3.76               |
| Ajap1              | adherens junction associated protein 1                          | NM_001099299  | 4.32E-08       | 5.60               |
| Ak4                | adenylate kinase 4                                              | NM_001177602  | 3.13E-07       | 1.94               |
| Ak5                | adenylate kinase 5                                              | NM_001081277  | 8.58E-07       | 2.09               |
| Akap6              | A kinase (PRKA) anchor protein 6                                | NM_198111     | 2.10E-07       | 4.21               |
| Aktip              | thymoma viral proto-oncogene 1 interacting protein              | NM_010241     | 1.75E-07       | 1.82               |
| Aldoc              | aldolase C, fructose-bisphosphate                               | NM_009657     | 4.54E-13       | 13.20              |
| Amigo2             | adhesion molecule with Ig like domain 2                         | NM_001164563  | 1.55E-05       | 2.11               |
| Amph               | amphiphysin                                                     | NM_001289546  | 2.38E-09       | 5.22               |
| Ank2               | ankyrin 2, brain                                                | NM_001034168  | 2.26E-10       | 3.38               |
| Ank3               | ankyrin 3, epithelial                                           | NM_009670     | 9.88E-10       | 4.06               |
| Ankrd34a           | ankyrin repeat domain 34A                                       | NM_001024851  | 0.0002732      | 1.95               |
| Ankrd34c           | ankyrin repeat domain 34C                                       | NM_207260     | 2.82E-06       | 2.39               |
| Ankrd55            | ankyrin repeat domain 55                                        | NM_001168404  | 2.17E-08       | 1.96               |
| Anks1b             | ankyrin repeat and sterile alpha motif domain containing 1B     | NM_001177397  | 2.60E-08       | 5.45               |
| Anln               | anillin, actin binding protein                                  | NM_028390     | 8.55E-07       | 2.35               |
| Ano4               | anoctamin 4                                                     | NM_001277188  | 2.86E-06       | 2.09               |
| Ap3m2              | adaptor-related protein complex 3, mu 2 subunit                 | NM_001122820  | 7.91E-07       | 2.29               |
| Apba1              | amyloid beta (A4) precursor protein binding, family A, member 1 | NM_177034     | 2.93E-08       | 3.88               |
| Apba2              | amyloid beta (A4) precursor protein-binding, family A           | NM_001291166  | 1.47E-07       | 3.92               |
| Apbb1              | amyloid beta (A4) precursor protein-binding, family B, member   | NM_001253885  | 4.78E-08       | 2.48               |
| Apc2               | adenomatosis polyposis coli 2                                   | NM_011789     | 1.59E-06       | 2.12               |
| Appl1              | amyloid beta (A4) precursor-like protein 1                      | NM_007467     | 3.94E-11       | 4.59               |
| Apod               | apolipoprotein D                                                | NM_007470     | 1.08E-11       | 5.26               |

**S3 Table: Differential changes in adrenal gene expression in ASP+CGP treated mice relative to ASP diet mice ( $\geq\pm 1.8$  fold change,  $p < 0.05$ ).**

| <i>Gene symbol</i> | <i>Gene name</i>                                                         | <i>RefSeq</i> | <i>P-value</i> | <i>Fold Change</i> |
|--------------------|--------------------------------------------------------------------------|---------------|----------------|--------------------|
| App                | amyloid beta (A4) precursor protein                                      | NM_001198823  | 1.31E-10       | 2.20               |
| Arhgap20           | Rho GTPase activating protein 20                                         | NM_175535     | 5.94E-08       | 3.98               |
| Arhgap32           | Rho GTPase activating protein 32                                         | NM_001195632  | 5.73E-07       | 2.18               |
| Arhgap36           | Rho GTPase activating protein 36                                         | NM_001081123  | 3.23E-07       | 3.96               |
| Arhgap44           | Rho GTPase activating protein 44                                         | NM_001099288  | 2.80E-09       | 2.12               |
| Arhgef4            | Rho guanine nucleotide exchange factor (GEF) 4                           | NM_183019     | 1.05E-08       | 3.35               |
| Arhgef9            | CDC42 guanine nucleotide exchange factor (GEF) 9                         | NM_001033329  | 6.65E-10       | 5.43               |
| Arpp21             | cyclic AMP-regulated phosphoprotein, 21                                  | NM_001177616  | 3.35E-09       | 3.56               |
| Arrb1              | arrestin, beta 1                                                         | NM_177231     | 1.34E-07       | 2.02               |
| Arxes1             | adipocyte-related X-chromosome expressed sequence 1                      | NM_029541     | 1.66E-06       | 2.47               |
| Arxes2             | adipocyte-related X-chromosome expressed sequence 2                      | NM_029823     | 3.59E-06       | 1.90               |
| Asic1              | acid-sensing (proton-gated) ion channel 1                                | NM_001289791  | 8.03E-07       | 2.10               |
| Asic2              | acid-sensing (proton-gated) ion channel 2                                | NM_001034013  | 1.04E-08       | 2.59               |
| Asphd2             | aspartate beta-hydroxylase domain containing 2                           | NM_028386     | 1.98E-06       | 2.81               |
| Asrgl1             | asparaginase like 1                                                      | NM_025610     | 6.78E-07       | 1.86               |
| Astn1              | astrotactin 1                                                            | NM_001205204  | 6.57E-10       | 2.90               |
| Atcay              | ataxia, cerebellar, Cayman type homolog (human)                          | NM_178662     | 4.36E-08       | 3.70               |
| Atl1               | atlastin GTPase 1                                                        | NM_178628     | 2.89E-09       | 4.34               |
| Atp13a4            | ATPase type 13A4                                                         | NM_001164612  | 2.81E-05       | 1.99               |
| Atp1a2             | ATPase, Na <sup>+</sup> K <sup>+</sup> transporting, alpha 2 polypeptide | NM_178405     | 3.18E-08       | 2.34               |
| Atp1a3             | ATPase, Na <sup>+</sup> K <sup>+</sup> transporting, alpha 3 polypeptide | NM_001290469  | 1.25E-11       | 7.11               |
| Atp1b1             | ATPase, Na <sup>+</sup> K <sup>+</sup> transporting, beta 1 polypeptide  | NM_009721     | 6.82E-10       | 3.86               |
| Atp1b2             | ATPase, Na <sup>+</sup> K <sup>+</sup> transporting, beta 2 polypeptide  | NM_013415     | 2.39E-08       | 3.30               |
| Atp2b1             | ATPase, Ca <sup>++</sup> transporting, plasma membrane 1                 | NM_026482     | 5.34E-08       | 2.15               |
| Atp2b2             | ATPase, Ca <sup>++</sup> transporting, plasma membrane 2                 | NM_001036684  | 5.66E-10       | 4.23               |
| Atp6ap2            | ATPase, H <sup>+</sup> transporting, lysosomal accessory protein 2       | NM_027439     | 1.04E-05       | 1.88               |
| Atp6v0a1           | ATPase, H <sup>+</sup> transporting, lysosomal VO subunit A1             | NM_001243049  | 8.64E-09       | 1.94               |
| Atp6v1b2           | ATPase, H <sup>+</sup> transporting, lysosomal V1 subunit B2             | NM_007509     | 4.02E-09       | 1.91               |
| Atp6v1c1           | ATPase, H <sup>+</sup> transporting, lysosomal V1 subunit C1             | NM_025494     | 1.98E-08       | 2.23               |
| Atp6v1g2           | ATPase, H <sup>+</sup> transporting, lysosomal V1 subunit G2             | NM_023179     | 1.56E-12       | 7.11               |
| Atp8a1             | ATPase, aminophospholipid transporter (APLT), class I, type 8            | NM_001038999  | 6.76E-09       | 2.93               |
| Atp8a2             | ATPase, aminophospholipid transporter-like, class I, type 8A2            | NM_015803     | 2.50E-07       | 2.20               |
| Atp9a              | ATPase, class II, type 9A                                                | NM_001289445  | 5.68E-07       | 1.90               |
| Atrn               | attractin                                                                | NM_009730     | 6.53E-09       | 1.84               |
| Atxn1              | ataxin 1                                                                 | NM_001199304  | 1.92E-07       | 2.22               |
| Atxn7l3            | ataxin 7-like 3                                                          | NM_001098836  | 1.05E-06       | 2.05               |
| Avp                | arginine vasopressin                                                     | NM_009732     | 6.09E-05       | 1.96               |
| B3galt5            | UDP-Gal:betaGlcNAc beta 1,3-galactosyltransferase                        | NM_001122993  | 1.41E-06       | 3.03               |
| B3gat2             | beta-1,3-glucuronyltransferase 2 (glucuronosyltransferase S)             | NM_172124     | 8.39E-06       | 2.06               |
| B4galnt4           | beta-1,4-N-acetyl-galactosaminyl transferase 4                           | NM_177897     | 7.00E-07       | 2.39               |
| B4galt6            | UDP-Gal:betaGlcNAc beta 1,4-galactosyltransferase                        | NM_019737     | 4.17E-09       | 2.64               |
| Baalc              | brain and acute leukemia, cytoplasmic                                    | NM_080640     | 1.99E-06       | 1.98               |
| Bai1               | brain-specific angiogenesis inhibitor 1                                  | NM_174991     | 1.79E-09       | 3.67               |
| Bai3               | brain-specific angiogenesis inhibitor 3                                  | NM_175642     | 3.04E-09       | 7.00               |
| Baiap3             | BAI1-associated protein 3                                                | NM_001163270  | 1.18E-05       | 2.06               |
| Basp1              | brain abundant, membrane attached signal protein 1                       | NM_027395     | 2.63E-07       | 2.71               |
| Bcas1              | breast carcinoma amplified sequence 1                                    | NM_001164369  | 3.77E-09       | 4.50               |
| Bcat1              | branched chain aminotransferase 1, cytosolic                             | NM_001024468  | 6.57E-09       | 4.22               |
| Begain             | brain-enriched guanylate kinase-associated                               | NM_001163175  | 2.23E-07       | 2.58               |
| Bend6              | BEN domain containing 6                                                  | NM_177235     | 5.03E-10       | 12.11              |

**S3 Table: Differential changes in adrenal gene expression in ASP+CGP treated mice relative to ASP diet mice ( $\geq\pm 1.8$  fold change,  $p < 0.05$ ).**

| <i>Gene symbol</i> | <i>Gene name</i>                                             | <i>RefSeq</i> | <i>P-value</i> | <i>Fold Change</i> |
|--------------------|--------------------------------------------------------------|---------------|----------------|--------------------|
| Bex1               | brain expressed gene 1                                       | NM_009052     | 1.93E-06       | 4.25               |
| Bex2               | brain expressed X-linked 2                                   | NM_009749     | 1.36E-06       | 2.17               |
| Bglap              | bone gamma carboxyglutamate protein                          | NM_001037939  | 0.0004952      | -2.14              |
| Bin1               | bridging integrator 1                                        | NM_001083334  | 3.53E-09       | 2.07               |
| Brinp1             | bone morphogenetic protein retinoic acid neural specific 1   | NM_019967     | 1.04E-08       | 3.18               |
| Brinp3             | bone morphogenetic protein retinoic acid neural specific 3   | NM_001145807  | 2.50E-06       | 2.71               |
| Brsk1              | BR serine threonine kinase 1                                 | NM_001003920  | 9.18E-09       | 4.62               |
| Brsk2              | BR serine threonine kinase 2                                 | NM_001009929  | 3.01E-08       | 4.06               |
| Btbd3              | BTB (POZ) domain containing 3                                | NM_001025431  | 4.73E-09       | 1.99               |
| Btnl5-ps           | butyrophilin-like 5, pseudogene                              | NR_004051     | 6.45E-06       | -2.95              |
| C1q13              | C1q-like 3                                                   | NM_153155     | 1.60E-06       | 1.95               |
| C1qtnf4            | C1q and tumor necrosis factor related protein 4              | NM_026161     | 0.0001288      | 1.85               |
| Cabp7              | calcium binding protein 7                                    | NM_138948     | 2.97E-05       | 2.50               |
| Cacna1a            | calcium channel, voltage-dependent, P Q type, alpha 1A       | NM_001252059  | 4.83E-08       | 2.39               |
| Cacna1b            | calcium channel, voltage-dependent, N type, alpha 1B subunit | NM_001042528  | 8.40E-08       | 2.60               |
| Cacna1e            | calcium channel, voltage-dependent, R type, alpha 1E subunit | NM_009782     | 6.87E-09       | 3.39               |
| Cacna1g            | calcium channel, voltage-dependent, T type, alpha 1G subunit | NM_001112813  | 2.00E-07       | 2.96               |
| Cacna1i            | calcium channel, voltage-dependent, alpha 1I subunit         | NM_001044308  | 5.88E-05       | 1.85               |
| Cacna2d2           | calcium channel, voltage-dependent, alpha 2 delta subunit 2  | NM_001174047  | 1.35E-09       | 3.03               |
| Cacna2d3           | calcium channel, voltage-dependent, alpha 2 delta subunit 3  | NM_009785     | 2.04E-07       | 2.28               |
| Cacnb1             | calcium channel, voltage-dependent, beta 1 subunit           | NM_001159319  | 2.07E-07       | 2.01               |
| Cacnb4             | calcium channel, voltage-dependent, beta 4 subunit           | NM_001037099  | 7.78E-09       | 5.30               |
| Cacng3             | calcium channel, voltage-dependent, gamma subunit 3          | NM_019430     | 5.01E-08       | 5.81               |
| Cacng4             | calcium channel, voltage-dependent, gamma subunit 4          | NM_019431     | 9.74E-07       | 2.33               |
| Cacng7             | calcium channel, voltage-dependent, gamma subunit 7          | NM_133189     | 5.50E-09       | 2.33               |
| Cadm2              | cell adhesion molecule 2                                     | NM_001145977  | 3.13E-11       | 7.07               |
| Cadm3              | cell adhesion molecule 3                                     | NM_053199     | 8.30E-09       | 5.36               |
| Cadm4              | cell adhesion molecule 4                                     | NM_153112     | 9.24E-06       | 2.27               |
| Cadps              | Ca <sup>2+</sup> -dependent secretion activator              | NM_001042617  | 3.80E-08       | 4.62               |
| Calb1              | calbindin 1                                                  | NM_009788     | 6.37E-10       | 11.20              |
| Calb2              | calbindin 2                                                  | NM_007586     | 1.94E-10       | 26.70              |
| Calcr              | calcitonin receptor                                          | NM_001042725  | 2.28E-06       | 1.85               |
| Caly               | calcyon neuron-specific vesicular protein                    | NM_001190385  | 6.21E-09       | 2.97               |
| Camk1g             | calcium calmodulin-dependent protein kinase I gamma          | NM_144817     | 6.13E-08       | 4.84               |
| Camk2a             | calcium calmodulin-dependent protein kinase II alpha         | NM_001286809  | 2.00E-11       | 16.26              |
| Camk2b             | calcium calmodulin-dependent protein kinase II, beta         | XM_006514478  | 6.87E-10       | 3.21               |
| Camk2g             | calcium calmodulin-dependent protein kinase II gamma         | NM_001039138  | 2.28E-07       | 2.22               |
| Camk2n1            | calcium calmodulin-dependent protein kinase II inhibitor 1   | NM_025451     | 6.58E-08       | 2.33               |
| Camkk1             | calcium calmodulin-dependent protein kinase kinase 1, alpha  | NM_018883     | 1.50E-05       | 1.89               |
| Camkv              | CaM kinase-like vesicle-associated                           | NM_145621     | 9.68E-09       | 4.19               |
| Camta1             | calmodulin binding transcription activator 1                 | NM_001081557  | 1.34E-12       | 9.47               |
| Cand1              | cullin associated and neddylation disassociated 1            | NM_027994     | 2.96E-06       | 1.89               |
| Cap2               | CAP, adenylate cyclase-associated protein, 2 (yeast)         | NM_026056     | 3.74E-08       | 4.82               |
| Car10              | carbonic anhydrase 10                                        | NM_028296     | 1.55E-08       | 5.10               |
| Car14              | carbonic anhydrase 14                                        | NM_011797     | 1.33E-06       | 2.04               |
| Cbln1              | cerebellin 1 precursor protein                               | NM_019626     | 1.63E-08       | 3.77               |
| Cbln2              | cerebellin 2 precursor protein                               | NM_172633     | 8.14E-08       | 1.94               |
| Cbx6               | chromobox 6                                                  | NM_028763     | 1.07E-07       | 1.89               |
| Ccdc106            | coiled-coil domain containing 106                            | NM_001290429  | 1.05E-06       | 2.08               |
| Ccdc85a            | coiled-coil domain containing 85A                            | NM_001166661  | 9.77E-08       | 2.84               |
| Ccdc92             | coiled-coil domain containing 92                             | NM_144819     | 2.14E-07       | 2.16               |

**S3 Table: Differential changes in adrenal gene expression in ASP+CGP treated mice relative to ASP diet mice ( $\geq\pm 1.8$  fold change,  $p < 0.05$ ).**

| <i>Gene symbol</i> | <i>Gene name</i>                                                 | <i>RefSeq</i> | <i>P-value</i> | <i>Fold Change</i> |
|--------------------|------------------------------------------------------------------|---------------|----------------|--------------------|
| Cck                | cholecystokinin                                                  | NM_001284508  | 1.35E-07       | 2.80               |
| Cdh13              | cadherin 13                                                      | NM_019707     | 4.31E-08       | 2.69               |
| Cdh8               | cadherin 8                                                       | NM_001285913  | 2.83E-06       | 3.21               |
| Cdk14              | cyclin-dependent kinase 14                                       | NM_011074     | 4.53E-06       | 2.11               |
| Cdk5r1             | cyclin-dependent kinase 5, regulatory subunit 1 (p35)            | NM_009871     | 1.05E-05       | 3.23               |
| Cdk5               | cyclin-dependent kinase-like 5                                   | NM_001024624  | 5.87E-06       | 2.08               |
| Cds1               | CDP-diacylglycerol synthase 1                                    | NM_173370     | 6.73E-06       | 2.13               |
| Cds2               | CDP-diacylglycerol synthase (phosphatidate cytidylyltransferase) | NM_001291039  | 1.48E-09       | 1.88               |
| Celf2              | CUGBP, Elav-like family member 2                                 | NM_001110231  | 3.90E-08       | 2.44               |
| Celf4              | CUGBP, Elav-like family member 4                                 | NM_001146292  | 2.50E-10       | 4.66               |
| Celf5              | CUGBP, Elav-like family member 5                                 | NM_176954     | 3.79E-05       | 1.94               |
| Celsr2             | cadherin, EGF LAG seven-pass G-type receptor 2                   | NM_001004177  | 5.13E-07       | 2.89               |
| Cend1              | cell cycle exit and neuronal differentiation 1                   | NM_021316     | 6.45E-11       | 6.19               |
| Cers6              | ceramide synthase 6                                              | NM_172856     | 3.97E-07       | 2.16               |
| Chd3os             | chromodomain helicase DNA binding protein 3                      | NR_027827     | 1.49E-05       | 2.15               |
| Chd5               | chromodomain helicase DNA binding protein 5                      | NM_001081376  | 9.55E-07       | 2.15               |
| Chl1               | cell adhesion molecule with homology to L1CAM                    | NM_007697     | 3.98E-06       | 2.70               |
| Chn1               | chimerin 1                                                       | NM_001113246  | 3.46E-10       | 5.74               |
| Chn2               | chimerin 2                                                       | NM_023543     | 6.08E-09       | 2.04               |
| Chrm2              | cholinergic receptor, muscarinic 2, cardiac                      | NM_203491     | 5.71E-07       | 5.04               |
| Chrm3              | cholinergic receptor, muscarinic 3, cardiac                      | NM_033269     | 2.63E-06       | 1.96               |
| Chrna4             | cholinergic receptor, nicotinic, alpha polypeptide 4             | NM_015730     | 1.09E-06       | 2.19               |
| Chrn2              | cholinergic receptor, nicotinic, beta polypeptide 2 (neuronal)   | NM_009602     | 2.36E-08       | 2.57               |
| Chst1              | carbohydrate (keratan sulfate Gal-6) sulfotransferase 1          | NM_023850     | 1.76E-07       | 2.24               |
| Ciart              | circadian associated repressor of transcription                  | NM_001033302  | 8.24E-06       | 3.34               |
| Cit                | citron                                                           | NM_007708     | 1.06E-07       | 2.93               |
| Ckb                | creatine kinase, brain                                           | NM_021273     | 4.00E-09       | 3.07               |
| Ckmt1              | creatine kinase, mitochondrial 1, ubiquitous                     | NM_009897     | 2.61E-09       | 3.84               |
| Clcn6              | chloride channel 6                                               | NM_011929     | 4.23E-09       | 2.80               |
| Cldn10             | claudin 10                                                       | NM_001160099  | 3.74E-07       | 3.54               |
| Cldn11             | claudin 11                                                       | NM_008770     | 1.66E-08       | 3.93               |
| Clip3              | CAP-GLY domain containing linker protein 3                       | NM_001081114  | 4.84E-09       | 3.42               |
| Clip4              | CAP-GLY domain containing linker protein family, member 4        | NM_001271483  | 1.86E-06       | 2.00               |
| Clmn               | calmin                                                           | NM_001040682  | 3.56E-06       | 2.31               |
| Clstn1             | calsyntenin 1                                                    | NM_001290989  | 9.43E-08       | 2.02               |
| Clstn2             | calsyntenin 2                                                    | NM_022319     | 6.01E-08       | 2.64               |
| Clstn3             | calsyntenin 3                                                    | NM_153508     | 6.89E-09       | 3.74               |
| Clvs1              | clavesin 1                                                       | NM_028940     | 1.51E-08       | 3.13               |
| Clvs2              | clavesin 2                                                       | NM_175448     | 7.05E-08       | 4.17               |
| Cmas               | cytidine monophospho-N-acetylneuraminic acid synthetase          | NM_009908     | 3.11E-08       | 2.03               |
| Cmtm5              | CKLF-like MARVEL transmembrane domain containing 5               | NM_026066     | 5.73E-09       | 6.63               |
| Cnih2              | cornichon homolog 2 (Drosophila)                                 | NM_009920     | 3.18E-11       | 6.23               |
| Cnksr2             | connector enhancer of kinase suppressor of Ras 2                 | NM_177751     | 9.07E-06       | 1.88               |
| Cnnm1              | cyclin M1                                                        | NM_031396     | 1.40E-08       | 5.46               |
| Cnp                | 2,3-cyclic nucleotide 3 phosphodiesterase                        | NM_001146318  | 4.57E-10       | 3.14               |
| Cntn1              | contactin 1                                                      | NM_001159647  | 1.19E-09       | 9.92               |
| Cntn2              | contactin 2                                                      | NM_177129     | 2.80E-07       | 2.97               |
| Cntn5              | contactin 5                                                      | NM_001033359  | 3.20E-07       | 1.92               |
| Cntnap1            | contactin associated protein-like 1                              | NM_016782     | 1.66E-08       | 4.60               |
| Cntnap2            | contactin associated protein-like 2                              | NM_001004357  | 1.17E-11       | 3.69               |
| Cntnap4            | contactin associated protein-like 4                              | NM_130457     | 0.000163       | 2.05               |

**S3 Table: Differential changes in adrenal gene expression in ASP+CGP treated mice relative to ASP diet mice ( $\geq\pm 1.8$  fold change,  $p < 0.05$ ).**

| <i>Gene symbol</i> | <i>Gene name</i>                                             | <i>RefSeq</i> | <i>P-value</i> | <i>Fold Change</i> |
|--------------------|--------------------------------------------------------------|---------------|----------------|--------------------|
| Coro2b             | coronin, actin binding protein, 2B                           | NM_175484     | 1.75E-06       | 1.92               |
| Cox8c              | cytochrome c oxidase subunit VIIIc                           | NM_001039049  | 0.0001352      | -1.81              |
| Cpeb3              | cytoplasmic polyadenylation element binding protein 3        | NM_001290826  | 1.73E-07       | 2.93               |
| Cplx1              | complexin 1                                                  | NM_007756     | 2.64E-09       | 8.59               |
| Cpne4              | copine IV                                                    | NM_028719     | 7.91E-09       | 2.15               |
| Cpne5              | copine V                                                     | NM_153166     | 2.97E-07       | 2.85               |
| Cpne6              | copine VI                                                    | NM_001136057  | 4.44E-09       | 5.20               |
| Cpne9              | copine family member IX                                      | NM_170673     | 3.12E-08       | 2.21               |
| Crmp1              | collapsin response mediator protein 1                        | NM_001136058  | 6.77E-10       | 2.01               |
| Cry2               | cryptochrome 2 (photolyase-like)                             | NM_009963     | 1.64E-08       | 2.02               |
| Cryab              | crystallin, alpha B                                          | NM_001289784  | 4.42E-07       | 2.09               |
| Csdc2              | cold shock domain containing C2, RNA binding                 | NM_145473     | 1.53E-07       | 1.92               |
| Csmd3              | CUB and Sushi multiple domains 3                             | NM_001081391  | 3.66E-07       | 3.28               |
| Cspg5              | chondroitin sulfate proteoglycan 5                           | NM_001166273  | 1.66E-10       | 3.48               |
| Csrnp3             | cysteine-serine-rich nuclear protein 3                       | NM_001290665  | 1.63E-07       | 3.29               |
| Ctnnd2             | catenin (cadherin associated protein), delta 2               | NM_008729     | 2.42E-11       | 4.32               |
| Ctrc               | chymotrypsin C (caldecrin)                                   | NM_001033875  | 7.64E-06       | -1.96              |
| Ctxn1              | cortexin 1                                                   | NM_183315     | 3.54E-11       | 3.49               |
| Ctxn2              | cortexin 2                                                   | NM_001162934  | 7.31E-06       | 2.79               |
| Cyp2b23            | cytochrome P450, family 2, subfamily b, polypeptide 23       | NM_001081148  | 6.01E-05       | -2.10              |
| Cyp2j9             | cytochrome P450, family 2, subfamily j, polypeptide 9        | NM_028979     | 7.49E-08       | 3.04               |
| Cyp3a11            | cytochrome P450, family 3, subfamily a, polypeptide 11       | NM_007818     | 8.04E-05       | 2.35               |
| Cyp46a1            | cytochrome P450, family 46, subfamily a, polypeptide 1       | NM_010010     | 4.91E-09       | 3.20               |
| Cyp4f15            | cytochrome P450, family 4, subfamily f, polypeptide 15       | NM_134127     | 8.91E-06       | 2.00               |
| Dab1               | disabled 1                                                   | NM_010014     | 4.27E-06       | 2.46               |
| Dagla              | diacylglycerol lipase, alpha                                 | NM_198114     | 3.21E-06       | 1.99               |
| Dbndd2             | dysbindin (dystrobrevin binding protein 1) domain containing | NM_001048227  | 1.48E-06       | 2.16               |
| Dcc                | deleted in colorectal carcinoma                              | NM_007831     | 7.14E-06       | 1.96               |
| Dclk1              | doublecortin-like kinase 1                                   | NM_001195538  | 9.09E-11       | 9.36               |
| Dclk2              | doublecortin-like kinase 2                                   | NM_001195498  | 5.66E-06       | 1.91               |
| Dcun1d4            | DCN1, defective in cullin neddylation 1, domain containing 4 | NM_001190733  | 7.49E-07       | 1.98               |
| Ddah1              | dimethylarginine dimethylaminohydrolase 1                    | NM_026993     | 9.71E-11       | 9.71               |
| Ddhd1              | DDHD domain containing 1                                     | NM_001039106  | 6.55E-08       | 2.03               |
| Ddn                | dendrin                                                      | NM_001013741  | 3.22E-08       | 4.51               |
| Ddx25              | DEAD (Asp-Glu-Ala-Asp) box polypeptide 25                    | NM_013932     | 5.76E-06       | 2.06               |
| Dennd6b            | DENN MADD domain containing 6B                               | NM_027081     | 1.49E-07       | 2.07               |
| Dgkb               | diacylglycerol kinase, beta                                  | AK032509      | 5.51E-09       | 2.16               |
| Dgkg               | diacylglycerol kinase, gamma                                 | NM_138650     | 1.01E-08       | 2.32               |
| Dgki               | diacylglycerol kinase, iota                                  | NM_001081206  | 1.32E-06       | 2.24               |
| Dgkk               | diacylglycerol kinase kappa                                  | NM_177914     | 1.07E-07       | 2.40               |
| Disp2              | dispatched homolog 2 (Drosophila)                            | NM_170593     | 6.46E-09       | 2.26               |
| Dlg4               | discs, large homolog 4 (Drosophila)                          | NM_001109752  | 2.90E-10       | 3.64               |
| Dlgap1             | discs, large (Drosophila) homolog-associated protein 1       | NM_001128180  | 2.18E-07       | 1.90               |
| Dlx1               | distal-less homeobox 1                                       | NM_010053     | 4.11E-07       | 2.33               |
| Dmtn               | dematin actin binding protein                                | NM_001252662  | 1.07E-08       | 2.17               |
| Dnajc18            | DnaJ (Hsp40) homolog, subfamily C, member 18                 | NM_029669     | 6.27E-06       | 2.22               |
| Dnajc27            | DnaJ (Hsp40) homolog, subfamily C, member 27                 | NM_153082     | 1.11E-08       | 2.79               |
| Dnajc6             | DnaJ (Hsp40) homolog, subfamily C, member 6                  | NM_001164583  | 2.83E-09       | 4.99               |
| Dner               | delta notch-like EGF-related receptor                        | NM_152915     | 1.56E-08       | 6.15               |
| Dnm1               | dynamamin 1                                                  | XM_006497658  | 3.70E-10       | 4.72               |
| Dnm3               | dynamamin 3                                                  | NM_001038619  | 4.13E-07       | 3.01               |

**S3 Table: Differential changes in adrenal gene expression in ASP+CGP treated mice relative to ASP diet mice ( $\geq\pm 1.8$  fold change,  $p < 0.05$ ).**

| <i>Gene symbol</i> | <i>Gene name</i>                                                    | <i>RefSeq</i> | <i>P-value</i> | <i>Fold Change</i> |
|--------------------|---------------------------------------------------------------------|---------------|----------------|--------------------|
| Dock3              | dedicator of cyto-kinesis 3                                         | NM_153413     | 1.34E-09       | 5.10               |
| Dock9              | dedicator of cytokinesis 9                                          | NM_001081039  | 1.32E-06       | 1.88               |
| Dok5               | docking protein 5                                                   | NM_001163686  | 1.37E-08       | 2.17               |
| Dpp10              | dipeptidylpeptidase 10                                              | NM_199021     | 6.89E-07       | 3.64               |
| Dpp6               | dipeptidylpeptidase 6                                               | NM_001136060  | 3.27E-10       | 4.25               |
| Dpysl2             | dihydropyrimidinase-like 2                                          | NM_009955     | 5.44E-09       | 2.31               |
| Dpysl5             | dihydropyrimidinase-like 5                                          | NM_023047     | 6.61E-08       | 2.48               |
| Drd2               | dopamine receptor D2                                                | NM_010077     | 8.82E-06       | 1.93               |
| Drp2               | dystrophin related protein 2                                        | NM_010078     | 4.44E-08       | 3.37               |
| Dscam              | Down syndrome cell adhesion molecule                                | NM_031174     | 5.16E-09       | 6.20               |
| Dtna               | dystrobrevin alpha                                                  | NM_001285807  | 3.69E-09       | 2.71               |
| Dusp15             | dual specificity phosphatase-like 15                                | NM_001159376  | 4.46E-07       | 2.80               |
| Dusp26             | dual specificity phosphatase 26 (putative)                          | NM_025869     | 3.49E-08       | 1.89               |
| Dync1i1            | dynein cytoplasmic 1 intermediate chain 1                           | NM_001191023  | 8.64E-07       | 3.01               |
| Dzank1             | double zinc ribbon and ankyrin repeat domains 1                     | NM_172859     | 2.55E-09       | 7.94               |
| Dzip1              | DAZ interacting protein 1                                           | NM_025943     | 4.12E-08       | 3.06               |
| Ecel1              | endothelin converting enzyme-like 1                                 | NM_001277925  | 2.50E-10       | 3.83               |
| Edil3              | EGF-like repeats and discoidin I-like domains 3                     | NM_001037987  | 7.76E-10       | 7.00               |
| Eef1a2             | eukaryotic translation elongation factor 1 alpha 2                  | NM_007906     | 8.46E-09       | 2.43               |
| Efna3              | ephrin A3                                                           | NM_010108     | 1.67E-07       | 4.00               |
| Efnb3              | ephrin B3                                                           | NM_007911     | 2.53E-05       | 2.34               |
| Efr3b              | EFR3 homolog B ( <i>S. cerevisiae</i> )                             | NM_001082483  | 5.16E-12       | 3.99               |
| Eif5a2             | eukaryotic translation initiation factor 5A2                        | NM_177586     | 1.05E-07       | 2.32               |
| Elavl2             | ELAV (embryonic lethal, abnormal vision, <i>Drosophila</i> )-like 2 | NM_001177883  | 7.54E-05       | 2.61               |
| Elavl3             | ELAV (embryonic lethal, abnormal vision, <i>Drosophila</i> )-like 3 | NM_010487     | 1.10E-09       | 4.51               |
| Elavl4             | ELAV (embryonic lethal, abnormal vision, <i>Drosophila</i> )-like 4 | NM_001163397  | 1.26E-08       | 3.65               |
| Elmo1              | engulfment and cell motility 1                                      | NM_080288     | 1.09E-07       | 2.27               |
| Elmod1             | ELMO CED-12 domain containing 1                                     | NM_177769     | 1.02E-10       | 6.69               |
| Elov14             | elongation of very long chain fatty acids SUR4                      | NM_148941     | 2.40E-08       | 5.08               |
| Endod1             | endonuclease domain containing 1                                    | NM_028013     | 3.23E-07       | 2.72               |
| Eno2               | enolase 2, gamma neuronal                                           | NM_013509     | 7.17E-12       | 8.08               |
| Enpp2              | ectonucleotide pyrophosphatase phosphodiesterase 2                  | NM_001136077  | 3.02E-07       | 2.40               |
| Entpd6             | ectonucleoside triphosphate diphosphohydrolase 6                    | NM_172117     | 4.00E-06       | 2.05               |
| Epdr1              | ependymin related protein 1 (zebrafish)                             | NM_134065     | 1.31E-06       | 2.15               |
| Epha4              | Eph receptor A4                                                     | NM_007936     | 2.81E-07       | 2.46               |
| Epha6              | Eph receptor A6                                                     | NM_007938     | 2.22E-08       | 2.79               |
| Ephb1              | Eph receptor B1                                                     | NM_001168296  | 3.40E-06       | 2.03               |
| ErbB4              | v-erb-a erythroblastic leukemia viral oncogene homolog 4            | NM_010154     | 1.33E-07       | 3.16               |
| Ermn               | ermin, ERM-like protein                                             | NM_029972     | 0.0002269      | 2.30               |
| Etnppl             | ethanolamine phosphate phospholyase                                 | NM_001163587  | 5.88E-08       | 4.75               |
| Extl2              | exostoses (multiple)-like 2                                         | NM_001163514  | 3.18E-06       | 1.84               |
| F3                 | coagulation factor III                                              | NM_010171     | 1.02E-05       | 2.51               |
| Fa2h               | fatty acid 2-hydroxylase                                            | NM_178086     | 9.73E-07       | 3.44               |
| Fabp7              | fatty acid binding protein 7, brain                                 | NM_021272     | 7.95E-09       | 2.61               |
| Faim2              | Fas apoptotic inhibitory molecule 2                                 | NM_001038658  | 7.62E-10       | 2.65               |
| Fam107a            | family with sequence similarity 107, member A                       | NM_183187     | 7.73E-10       | 6.05               |
| Fam120c            | family with sequence similarity 120, member C                       | NM_198105     | 3.19E-06       | 1.81               |
| Fam131b            | family with sequence similarity 131, member B                       | NM_001113327  | 2.33E-07       | 2.05               |
| Fam135b            | family with sequence similarity 135, member B                       | NM_177819     | 0.0076601      | 2.17               |
| Fam155a            | family with sequence similarity 155, member A                       | NM_173446     | 2.32E-06       | 2.29               |
| Fam169a            | family with sequence similarity 169, member A                       | NM_001100458  | 5.45E-06       | 2.28               |

**S3 Table: Differential changes in adrenal gene expression in ASP+CGP treated mice relative to ASP diet mice ( $\geq \pm 1.8$  fold change,  $p < 0.05$ ).**

| <i>Gene symbol</i> | <i>Gene name</i>                                           | <i>RefSeq</i> | <i>P-value</i> | <i>Fold Change</i> |
|--------------------|------------------------------------------------------------|---------------|----------------|--------------------|
| Fam171b            | family with sequence similarity 171, member B              | NM_175514     | 4.00E-09       | 4.74               |
| Fam19a5            | family with sequence similarity 19, member A5              | NM_001252310  | 1.32E-07       | 1.96               |
| Fam217b            | family with sequence similarity 217, member B              | NM_001081289  | 8.12E-06       | 1.91               |
| Fam219a            | family with sequence similarity 219, member A              | NM_001159583  | 7.64E-08       | 2.21               |
| Fam49b             | family with sequence similarity 49, member B               | NM_144846     | 2.62E-08       | 2.08               |
| Fam63b             | family with sequence similarity 63, member B               | NM_172772     | 0.0002835      | 1.90               |
| Fam65b             | family with sequence similarity 65, member B               | NM_001286100  | 1.46E-08       | 2.24               |
| Fam73a             | family with sequence similarity 73, member A               | NM_001162375  | 6.29E-07       | 2.01               |
| Fam81a             | family with sequence similarity 81, member A               | NM_029784     | 3.05E-06       | 2.28               |
| Fam84a             | family with sequence similarity 84, member A               | NM_029007     | 3.14E-05       | 2.19               |
| Far2               | fatty acyl CoA reductase 2                                 | NM_178797     | 4.44E-08       | 2.98               |
| Fat3               | FAT tumor suppressor homolog 3 (Drosophila)                | NM_001080814  | 5.79E-08       | 3.72               |
| Fbxl16             | F-box and leucine-rich repeat protein 16                   | NM_001164225  | 2.06E-09       | 2.46               |
| Fbxo44             | F-box protein 44                                           | NM_001161851  | 4.27E-07       | 2.19               |
| Fcho1              | FCH domain only 1                                          | NM_028715     | 0.0001526      | 1.82               |
| Fez1               | fasciculation and elongation protein zeta 1 (zygin I)      | NM_183171     | 7.30E-11       | 5.26               |
| Fgf12              | fibroblast growth factor 12                                | NM_183064     | 1.44E-08       | 5.64               |
| Fgf13              | fibroblast growth factor 13                                | NM_001290415  | 7.46E-06       | 2.41               |
| Fgf14              | fibroblast growth factor 14                                | NM_010201     | 2.31E-09       | 3.31               |
| Fgfr3              | fibroblast growth factor receptor 3                        | NM_001163215  | 1.06E-07       | 3.42               |
| Fmn2               | formin 2                                                   | NM_019445     | 3.73E-08       | 2.45               |
| Fn3k               | fructosamine 3 kinase                                      | NM_001038699  | 5.31E-06       | 1.82               |
| Fnbp1              | formin binding protein 1                                   | NM_001038700  | 8.34E-07       | 1.96               |
| Fndc4              | fibronectin type III domain containing 4                   | NM_022424     | 8.01E-06       | 2.09               |
| Fndc9              | fibronectin type III domain containing 9                   | NM_177075     | 5.51E-05       | 1.85               |
| Frmpd3             | FERM and PDZ domain containing 3                           | NM_177750     | 9.54E-08       | 2.77               |
| Frrs1l             | ferric-chelate reductase 1 like                            | NM_001142965  | 5.46E-09       | 4.89               |
| Fry                | furry homolog (Drosophila)                                 | NM_172887     | 1.15E-09       | 3.25               |
| Fscn1              | fascin homolog 1, actin bundling protein                   | NM_007984     | 6.84E-07       | 2.13               |
| Fsd1               | fibronectin type 3 and SPRY domain-containing protein      | NM_183178     | 1.77E-07       | 1.97               |
| Fstl4              | follistatin-like 4                                         | NM_177059     | 0.0001103      | 1.88               |
| Fto                | fat mass and obesity associated                            | NM_011936     | 1.80E-08       | 1.81               |
| Fuca2              | fucosidase, alpha-L- 2, plasma                             | NM_025799     | 7.89E-08       | 1.90               |
| Fxyd7              | FXDY domain-containing ion transport regulator 7           | NM_022007     | 7.09E-07       | 2.63               |
| Gaa                | glucosidase, alpha, acid                                   | NM_001159324  | 4.94E-08       | 1.83               |
| Gabbr1             | gamma-aminobutyric acid (GABA) B receptor, 1               | NM_019439     | 2.46E-11       | 6.47               |
| Gabbr2             | gamma-aminobutyric acid (GABA) B receptor, 2               | NM_001081141  | 6.47E-12       | 9.58               |
| Gabra1             | gamma-aminobutyric acid (GABA) A receptor, subunit alpha 1 | NM_010250     | 2.33E-12       | 39.65              |
| Gabra2             | gamma-aminobutyric acid (GABA) A receptor, subunit alpha 2 | NM_008066     | 1.14E-07       | 2.61               |
| Gabra3             | gamma-aminobutyric acid (GABA) A receptor, subunit alpha 3 | NM_008067     | 8.46E-08       | 2.53               |
| Gabra4             | gamma-aminobutyric acid (GABA) A receptor, subunit alpha 4 | NM_010251     | 2.52E-08       | 5.47               |
| Gabra5             | gamma-aminobutyric acid (GABA) A receptor, subunit alpha 5 | NM_176942     | 5.07E-11       | 10.82              |
| Gabrb1             | gamma-aminobutyric acid (GABA) A receptor, subunit beta 1  | NM_008069     | 7.46E-11       | 6.11               |
| Gabrb2             | gamma-aminobutyric acid (GABA) A receptor, subunit beta 2  | NM_008070     | 2.23E-10       | 13.75              |
| Gabrb3             | gamma-aminobutyric acid (GABA) A receptor, subunit beta 3  | NM_001038701  | 7.30E-09       | 3.03               |
| Gabre              | gamma-aminobutyric acid (GABA) A receptor, subunit epsilon | NM_017369     | 4.59E-07       | 2.56               |
| Gabrg1             | gamma-aminobutyric acid (GABA) A receptor, subunit gamma 1 | NM_010252     | 3.25E-09       | 8.44               |
| Gabrg2             | gamma-aminobutyric acid (GABA) A receptor, subunit gamma 2 | NM_008073     | 1.76E-10       | 7.49               |
| Gabrg3             | gamma-aminobutyric acid (GABA) A receptor, subunit gamma 3 | NM_008074     | 6.55E-08       | 4.15               |
| Gabrq              | gamma-aminobutyric acid (GABA) A receptor, subunit theta   | NM_001290435  | 4.50E-09       | 6.42               |
| Gad1               | glutamate decarboxylase 1                                  | NM_008077     | 3.52E-10       | 4.19               |

**S3 Table: Differential changes in adrenal gene expression in ASP+CGP treated mice relative to ASP diet mice ( $\geq\pm 1.8$  fold change,  $p < 0.05$ ).**

| <i>Gene symbol</i> | <i>Gene name</i>                                                                | <i>RefSeq</i> | <i>P-value</i> | <i>Fold Change</i> |
|--------------------|---------------------------------------------------------------------------------|---------------|----------------|--------------------|
| Gad2               | glutamic acid decarboxylase 2                                                   | NM_008078     | 2.65E-10       | 11.90              |
| Gal3st3            | galactose-3-O-sulfotransferase 3                                                | NM_001024717  | 2.14E-05       | 1.84               |
| Galnt13            | UDP-N-acetyl-alpha-D-galactosamine:polypeptide N-acetylgalactosyltransferase 13 | NM_173030     | 6.87E-08       | 3.46               |
| Galnt16            | UDP-N-acetyl-alpha-D-galactosamine:polypeptide N-acetylgalactosyltransferase 16 | NM_001081421  | 4.36E-07       | 2.04               |
| Galnt6             | UDP-N-acetyl-alpha-D-galactosamine:polypeptide N-acetylgalactosyltransferase 6  | NM_175032     | 2.14E-07       | 1.87               |
| Gap43              | growth associated protein 43                                                    | NM_008083     | 7.85E-08       | 6.77               |
| Gatm               | glycine amidinotransferase                                                      | NM_025961     | 5.23E-09       | 6.92               |
| Gatsl2             | GATS protein-like 2                                                             | NM_030719     | 3.25E-09       | 1.99               |
| Gda                | guanine deaminase                                                               | NM_010266     | 1.27E-05       | 1.88               |
| Gdap1              | ganglioside-induced differentiation-associated-protein 1                        | NM_010267     | 6.48E-06       | 2.25               |
| Gdap11             | ganglioside-induced differentiation-associated protein 1-1                      | NM_144891     | 8.10E-08       | 2.69               |
| Gdf1               | growth differentiation factor 1                                                 | NM_001163282  | 4.70E-06       | 1.98               |
| Gdpd1              | glycerophosphodiester phosphodiesterase domain containing 1                     | NM_025638     | 1.74E-07       | 2.63               |
| Gfap               | glial fibrillary acidic protein                                                 | NM_010277     | 9.70E-09       | 3.94               |
| Ggt7               | gamma-glutamyltransferase 7                                                     | NM_144786     | 9.18E-08       | 2.34               |
| Git1               | G protein-coupled receptor kinase-interactor 1                                  | NM_001004144  | 1.01E-07       | 1.85               |
| Gja1               | gap junction protein, alpha 1                                                   | NM_010288     | 5.32E-09       | 2.26               |
| Gjb6               | gap junction protein, beta 6                                                    | NM_001271663  | 8.83E-09       | 4.62               |
| Gjc3               | gap junction protein, gamma 3                                                   | NM_080450     | 3.76E-11       | 9.47               |
| Glp1r              | glucagon-like peptide 1 receptor                                                | NM_021332     | 1.14E-05       | 1.86               |
| Gla1               | glycine receptor, alpha 1 subunit                                               | NM_001290821  | 9.30E-07       | 3.75               |
| Gla2               | glycine receptor, alpha 2 subunit                                               | NM_183427     | 2.15E-09       | 4.17               |
| Glrb               | glycine receptor, beta subunit                                                  | NM_001281969  | 2.03E-08       | 3.29               |
| Gls                | glutaminase                                                                     | NM_001113383  | 6.08E-05       | 1.81               |
| Gnai1              | guanine nucleotide binding protein (G protein), alpha inhibiting                | NM_010305     | 2.01E-07       | 2.76               |
| Gnal               | guanine nucleotide binding protein, alpha stimulating,                          | NM_010307     | 1.68E-08       | 7.69               |
| Gnaz               | guanine nucleotide binding protein, alpha z subunit                             | NM_010311     | 1.22E-07       | 2.06               |
| Gng2               | guanine nucleotide binding protein (G protein), gamma 2                         | NM_001038637  | 4.76E-09       | 2.29               |
| Gng3               | guanine nucleotide binding protein (G protein), gamma 3                         | NM_010316     | 1.14E-09       | 2.93               |
| Gng7               | guanine nucleotide binding protein (G protein), gamma 7                         | NM_001038655  | 2.01E-06       | 1.96               |
| Gnl3l              | guanine nucleotide binding protein-like 3 (nucleolar)-like                      | NM_001168600  | 3.31E-07       | 2.11               |
| Gp1bb              | glycoprotein Ib, beta polypeptide                                               | NM_001001999  | 4.30E-10       | 2.74               |
| Gpc5               | glypican 5                                                                      | NM_175500     | 0.0001091      | 2.08               |
| Gpld1              | glycosylphosphatidylinositol specific phospholipase D1                          | NM_008156     | 1.54E-08       | 3.30               |
| Gpm6a              | glycoprotein m6a                                                                | NM_001253754  | 2.65E-13       | 20.74              |
| Gpm6b              | glycoprotein m6b                                                                | NM_001177955  | 2.59E-11       | 8.33               |
| Gpr101             | G protein-coupled receptor 101                                                  | NM_001033360  | 4.04E-05       | 1.93               |
| Gpr123             | G protein-coupled receptor 123                                                  | NM_177469     | 2.41E-08       | 2.08               |
| Gpr155             | G protein-coupled receptor 155                                                  | NM_001190297  | 6.50E-07       | 1.86               |
| Gpr158             | G protein-coupled receptor 158                                                  | NM_001004761  | 2.40E-09       | 4.76               |
| Gpr162             | G protein-coupled receptor 162                                                  | NM_013533     | 1.66E-08       | 4.12               |
| Gpr165             | G protein-coupled receptor 165                                                  | NM_029536     | 1.83E-08       | 7.85               |
| Gpr37              | G protein-coupled receptor 37                                                   | NM_010338     | 2.53E-07       | 3.99               |
| Gpr37l1            | G protein-coupled receptor 37-like 1                                            | NM_134438     | 1.03E-09       | 6.06               |
| Gpr50              | G-protein-coupled receptor 50                                                   | NM_010340     | 7.55E-07       | 3.57               |
| Gpr52              | G protein-coupled receptor 52                                                   | NM_001146330  | 4.12E-05       | 2.06               |
| Gpr83              | G protein-coupled receptor 83                                                   | NM_010287     | 1.54E-05       | 2.38               |
| Gprasp2            | G protein-coupled receptor associated sorting protein 2                         | NM_001163015  | 4.86E-08       | 3.08               |
| Gria1              | glutamate receptor, ionotropic, AMPA1 (alpha 1)                                 | NM_001113325  | 9.87E-10       | 15.85              |
| Gria2              | glutamate receptor, ionotropic, AMPA2 (alpha 2)                                 | NM_001039195  | 2.08E-08       | 2.86               |
| Gria4              | glutamate receptor, ionotropic, AMPA4 (alpha 4)                                 | NM_001113180  | 1.09E-06       | 2.53               |



**S3 Table: Differential changes in adrenal gene expression in ASP+CGP treated mice relative to ASP diet mice ( $\geq\pm 1.8$  fold change,  $p < 0.05$ ).**

| <i>Gene symbol</i> | <i>Gene name</i>                                               | <i>RefSeq</i> | <i>P-value</i> | <i>Fold Change</i> |
|--------------------|----------------------------------------------------------------|---------------|----------------|--------------------|
| Grid1              | glutamate receptor, ionotropic, delta 1                        | NM_008166     | 2.10E-08       | 4.99               |
| Grid2              | glutamate receptor, ionotropic, delta 2                        | NM_008167     | 5.23E-07       | 3.10               |
| Grik2              | glutamate receptor, ionotropic, kainate 2 (beta 2)             | NM_001111268  | 1.55E-07       | 3.16               |
| Grik3              | glutamate receptor, ionotropic, kainate 3                      | NM_001081097  | 4.22E-08       | 3.46               |
| Grik5              | glutamate receptor, ionotropic, kainate 5 (gamma 2)            | NM_008168     | 6.89E-08       | 1.93               |
| Grin1              | glutamate receptor, ionotropic, NMDA1 (zeta 1)                 | NM_001177656  | 5.97E-11       | 3.28               |
| Grin2a             | glutamate receptor, ionotropic, NMDA2A (epsilon 1)             | NM_008170     | 4.30E-06       | 2.96               |
| Grin2b             | glutamate receptor, ionotropic, NMDA2B (epsilon 2)             | NM_008171     | 3.46E-09       | 4.79               |
| Grin2d             | glutamate receptor, ionotropic, NMDA2D (epsilon 4)             | NM_008172     | 7.65E-06       | 1.99               |
| Grin3a             | glutamate receptor ionotropic, NMDA3A                          | NM_001033351  | 1.12E-10       | 3.23               |
| Grm1               | glutamate receptor, metabotropic 1                             | NM_001114333  | 8.93E-08       | 10.30              |
| Grm2               | glutamate receptor, metabotropic 2                             | NM_001160353  | 0.0002441      | 1.88               |
| Grm3               | glutamate receptor, metabotropic 3                             | NM_181850     | 7.70E-09       | 4.28               |
| Grm4               | glutamate receptor, metabotropic 4                             | NM_001013385  | 2.06E-06       | 1.84               |
| Grm5               | glutamate receptor, metabotropic 5                             | NM_001081414  | 1.56E-09       | 4.42               |
| Grm7               | glutamate receptor, metabotropic 7                             | NM_177328     | 9.30E-07       | 2.21               |
| Gstm6              | glutathione S-transferase, mu 6                                | NM_008184     | 5.17E-07       | 1.84               |
| Gucy1b3            | guanylate cyclase 1, soluble, beta 3                           | NM_001161796  | 5.14E-06       | 2.11               |
| Habp4              | hyaluronic acid binding protein 4                              | NM_019986     | 4.60E-06       | 2.12               |
| Hamp               | hepcidin antimicrobial peptide                                 | NM_032541     | 1.37E-07       | 2.24               |
| Hap1               | huntingtin-associated protein 1                                | NM_010404     | 2.72E-08       | 2.34               |
| Hapln4             | hyaluronan and proteoglycan link protein 4                     | NM_177900     | 3.36E-06       | 2.52               |
| Hcn1               | hyperpolarization-activated, cyclic nucleotide-gated K+ 1      | NM_010408     | 8.38E-09       | 6.17               |
| Hcn2               | hyperpolarization-activated, cyclic nucleotide-gated K+ 2      | NM_008226     | 3.71E-08       | 3.83               |
| Hcrt               | hypocretin                                                     | NM_010410     | 6.61E-09       | 9.85               |
| Hcst               | Hcst hematopoietic cell signal transducer                      | NM_011827     | 7.56E-05       | -1.89              |
| Hdac11             | histone deacetylase 11                                         | NM_144919     | 3.13E-08       | 3.38               |
| Hdac9              | histone deacetylase 9                                          | NM_024124     | 1.81E-06       | 2.06               |
| Hecw1              | HECT, C2 and WW domain containing E3 ubiquitin protein ligase  | NM_001081348  | 3.74E-07       | 2.51               |
| Hepacam            | hepatocyte cell adhesion molecule                              | NM_175189     | 1.37E-09       | 7.66               |
| Herc3              | hect domain and RLD 3                                          | NM_028705     | 1.53E-07       | 2.72               |
| Hey1               | hairy enhancer-of-split related with YRPW motif 1              | NM_010423     | 3.17E-07       | 2.28               |
| Hivep2             | human immunodeficiency virus type I enhancer binding protein 2 | NM_010437     | 2.17E-05       | 1.85               |
| Hk1                | hexokinase 1                                                   | NM_001146100  | 4.50E-08       | 2.02               |
| Homer2             | homer homolog 2 (Drosophila)                                   | NM_001164086  | 1.13E-06       | 2.39               |
| Hpca               | hippocalcin                                                    | NM_001130419  | 2.28E-10       | 6.19               |
| Hpcal4             | hippocalcin-like 4                                             | NM_174998     | 4.16E-10       | 5.07               |
| Hrh3               | histamine receptor H3                                          | NM_133849     | 4.06E-09       | 3.60               |
| Hs6st2             | heparan sulfate 6-O-sulfotransferase 2                         | NM_001077202  | 1.43E-09       | 3.80               |
| Htr1b              | 5-hydroxytryptamine (serotonin) receptor 1B                    | NM_010482     | 7.08E-08       | 2.10               |
| Htr2c              | 5-hydroxytryptamine (serotonin) receptor 2C                    | NM_008312     | 6.16E-09       | 5.96               |
| Htra1              | HtrA serine peptidase 1                                        | NM_019564     | 5.19E-07       | 2.22               |
| Ids                | iduronate 2-sulfatase                                          | NM_010498     | 4.50E-09       | 2.07               |
| Igsf1              | immunoglobulin superfamily, member 1                           | NM_177591     | 4.98E-07       | 2.13               |
| Igsf21             | immunoglobulin superfamily, member 21                          | NM_198610     | 1.02E-07       | 2.58               |
| Ildr2              | immunoglobulin-like domain containing receptor 2               | NM_001164528  | 8.71E-06       | 2.18               |
| Impact             | impact, RWD domain protein                                     | NM_008378     | 1.93E-09       | 2.56               |
| Ina                | internexin neuronal intermediate filament protein, alpha       | NM_146100     | 8.84E-11       | 3.89               |
| Inpp4a             | inositol polyphosphate-4-phosphatase, type I                   | NM_001290797  | 5.89E-09       | 2.07               |
| Inpp5j             | inositol polyphosphate 5-phosphatase J                         | NM_172439     | 2.70E-07       | 2.75               |
| Iqsec3             | IQ motif and Sec7 domain 3                                     | NM_001033354  | 1.26E-07       | 3.01               |

**S3 Table: Differential changes in adrenal gene expression in ASP+CGP treated mice relative to ASP diet mice ( $\geq\pm 1.8$  fold change,  $p < 0.05$ ).**

| <i>Gene symbol</i> | <i>Gene name</i>                                              | <i>RefSeq</i> | <i>P-value</i> | <i>Fold Change</i> |
|--------------------|---------------------------------------------------------------|---------------|----------------|--------------------|
| Irs4               | insulin receptor substrate 4                                  | NM_010572     | 0.0001244      | 2.06               |
| Itgb8              | integrin beta 8                                               | NM_177290     | 3.44E-05       | 1.93               |
| Itih3              | inter-alpha trypsin inhibitor, heavy chain 3                  | NM_008407     | 4.33E-09       | 4.83               |
| Itm2a              | integral membrane protein 2A                                  | NM_008409     | 5.15E-08       | 2.76               |
| Jakmip2            | janus kinase and microtubule interacting protein 2            | NM_001163637  | 0.0001077      | 2.04               |
| Jph3               | junctophilin 3                                                | NM_020605     | 1.09E-06       | 2.63               |
| Katnal1            | katanin p60 subunit A-like 1                                  | NM_153572     | 6.74E-06       | 1.87               |
| Kcna1              | potassium voltage-gated channel, shaker-related subfamily     | NM_010595     | 7.27E-07       | 3.11               |
| Kcna2              | potassium voltage-gated channel, shaker-related subfamily     | NM_008417     | 1.78E-07       | 3.48               |
| Kcna4              | potassium voltage-gated channel, shaker-related subfamily     | NM_021275     | 4.21E-05       | 2.13               |
| Kcna6              | potassium voltage-gated channel, shaker-related, subfamily    | NM_013568     | 5.22E-11       | 4.43               |
| Kcnab1             | potassium voltage-gated channel, shaker-related subfamily     | NM_001289450  | 1.17E-07       | 2.65               |
| Kcnab2             | potassium voltage-gated channel, shaker-related subfamily     | NM_001252654  | 1.36E-08       | 4.35               |
| Kcnc1              | potassium voltage gated channel, Shaw-related subfamily)      | NM_008421     | 4.40E-10       | 4.62               |
| Kcnc2              | potassium voltage gated channel, Shaw-related subfamily       | NM_001025581  | 6.89E-09       | 6.44               |
| Kcnd2              | potassium voltage-gated channel, Shal-related, member 2       | NM_019697     | 7.16E-08       | 4.44               |
| Kcnd3              | potassium voltage-gated channel, Shal-related family 3        | NM_001039347  | 5.36E-07       | 2.01               |
| Kcnh1              | potassium voltage-gated channel, subfamily H1                 | NM_001038607  | 8.33E-08       | 2.02               |
| Kcnh5              | potassium voltage-gated channel, subfamily H (eag-related)    | NM_172805     | 1.93E-08       | 2.10               |
| Kcnip1             | Kv channel-interacting protein 1                              | NM_001190885  | 2.52E-06       | 1.95               |
| Kcnip2             | Kv channel-interacting protein 2                              | NM_001276358  | 6.99E-07       | 2.10               |
| Kcnip3             | Kv channel interacting protein 3, calsenilin                  | NM_001111331  | 1.15E-07       | 2.54               |
| Kcnip4             | Kv channel interacting protein 4                              | NM_001199242  | 2.31E-10       | 6.44               |
| Kcnj10             | potassium inwardly-rectifying channel, subfamily J, member 10 | NM_001039484  | 3.18E-08       | 7.78               |
| Kcnj16             | potassium inwardly-rectifying channel, subfamily J, member 16 | NM_001252207  | 1.30E-07       | 2.71               |
| Kcnj3              | potassium inwardly-rectifying channel, subfamily J, member 3  | NM_008426     | 1.67E-08       | 2.88               |
| Kcnq2              | potassium voltage-gated channel, subfamily Q, member 2        | NM_001003824  | 2.35E-08       | 2.51               |
| Kcnq5              | potassium voltage-gated channel, subfamily Q, member 5        | NM_001160139  | 1.60E-06       | 2.39               |
| Kcnt1              | potassium channel, subfamily T, member 1                      | NM_001145403  | 2.48E-10       | 2.10               |
| Kctd3              | potassium channel tetramerisation domain containing 3         | NM_172650     | 0.000201       | 1.81               |
| Kif1a              | kinesin family member 1A                                      | NM_001110315  | 7.47E-10       | 3.21               |
| Kif1b              | kinesin family member 1B                                      | NM_008441     | 7.54E-08       | 2.06               |
| Kif21a             | kinesin family member 21A                                     | NM_001109040  | 6.63E-08       | 2.10               |
| Kif3a              | kinesin family member 3A                                      | NM_001290805  | 0.0001168      | 1.96               |
| Kif3c              | kinesin family member 3C                                      | NM_008445     | 8.95E-06       | 1.94               |
| Kif5a              | kinesin family member 5A                                      | NM_001039000  | 1.36E-10       | 11.51              |
| Kif5c              | kinesin family member 5C                                      | NM_008449     | 2.20E-08       | 4.26               |
| Kifap3             | kinesin-associated protein 3                                  | NM_010629     | 1.36E-09       | 2.56               |
| Kifc2              | kinesin family member C2                                      | NM_010630     | 1.92E-11       | 2.51               |
| Kirrel3            | kin of IRRE like 3 (Drosophila)                               | NM_001190911  | 3.02E-06       | 2.23               |
| Klc2               | kinesin light chain 2                                         | NM_008451     | 9.76E-07       | 1.82               |
| Kndc1              | kinase non-catalytic C-lobe domain (KIND) containing 1        | NM_177261     | 3.30E-09       | 5.17               |
| Krtap10-10         | keratin associated protein 10-10                              | NM_001024709  | 6.86E-05       | -2.10              |
| Krtap10-4          | keratin associated protein 10-4                               | NM_001135991  | 0.0004312      | -1.96              |
| Krtap1-3           | keratin associated protein 1-3                                | NM_001085526  | 0.0001978      | -1.82              |
| Krtap5-3           | keratin associated protein 5-3                                | NM_023860     | 0.0006283      | -2.26              |
| L1cam              | L1 cell adhesion molecule                                     | NM_008478     | 3.77E-10       | 3.16               |
| Lamp5              | lysosomal-associated membrane protein family, member 5        | NM_029530     | 2.22E-06       | 2.50               |
| Lancl2             | LanC (bacterial lantibiotic synthetase component C)-like 2    | NM_133737     | 3.64E-07       | 1.97               |
| Lcat               | lecithin cholesterol acyltransferase                          | NM_008490     | 2.48E-05       | 1.86               |
| Ldhd               | lactate dehydrogenase B                                       | NM_008492     | 1.33E-08       | 2.38               |

**S3 Table: Differential changes in adrenal gene expression in ASP+CGP treated mice relative to ASP diet mice ( $\geq\pm 1.8$  fold change,  $p < 0.05$ ).**

| <i>Gene symbol</i> | <i>Gene name</i>                                                 | <i>RefSeq</i> | <i>P-value</i> | <i>Fold Change</i> |
|--------------------|------------------------------------------------------------------|---------------|----------------|--------------------|
| Lgi1               | leucine-rich repeat LGI family, member 1                         | NM_020278     | 1.35E-08       | 11.82              |
| Lgi2               | leucine-rich repeat LGI family, member 2                         | NM_144945     | 1.51E-07       | 3.78               |
| Lgi3               | leucine-rich repeat LGI family, member 3                         | NM_145219     | 3.45E-10       | 4.12               |
| Lin7b              | lin-7 homolog B (C. elegans)                                     | NM_011698     | 7.99E-07       | 1.90               |
| Lingo1             | leucine rich repeat and Ig domain containing 1                   | NM_181074     | 1.65E-09       | 4.13               |
| Lingo2             | leucine rich repeat and Ig domain containing 2                   | NM_001166001  | 2.20E-06       | 2.03               |
| Lmo3               | LIM domain only 3                                                | NM_207222     | 6.44E-09       | 3.92               |
| Lonrf2             | LON peptidase N-terminal domain and ring finger 2                | NM_001029878  | 8.53E-10       | 4.56               |
| Lor                | loricrin                                                         | NM_008508     | 5.65E-06       | 1.90               |
| Lpcat4             | lysophosphatidylcholine acyltransferase 4                        | NM_207206     | 1.14E-06       | 2.27               |
| Lpgat1             | lysophosphatidylglycerol acyltransferase 1                       | NM_001134829  | 4.12E-07       | 1.87               |
| Lphn2              | latrophilin 2                                                    | NM_001081298  | 1.48E-08       | 7.69               |
| Lphn3              | latrophilin 3                                                    | NM_198702     | 3.22E-09       | 6.48               |
| Lrnf5              | leucine rich repeat and fibronectin type III domain containing 5 | NM_178714     | 3.71E-07       | 2.73               |
| Lrig1              | leucine-rich repeats and immunoglobulin-like domains 1           | NM_008377     | 9.01E-08       | 2.02               |
| Lrrc49             | leucine rich repeat containing 49                                | NM_001146046  | 8.60E-08       | 1.90               |
| Lrrc4c             | leucine rich repeat containing 4C                                | NM_001289742  | 1.66E-06       | 3.13               |
| Lrrc7              | leucine rich repeat containing 7                                 | NM_001081358  | 3.33E-09       | 5.35               |
| Lrrn1              | leucine rich repeat protein 1, neuronal                          | NM_008516     | 1.78E-07       | 2.39               |
| Lrrtm1             | leucine rich repeat transmembrane neuronal 1                     | NM_028880     | 1.24E-08       | 4.31               |
| Lrrtm2             | leucine rich repeat transmembrane neuronal 2                     | NM_178005     | 1.70E-07       | 3.53               |
| Lrrtm3             | leucine rich repeat transmembrane neuronal 3                     | NM_178678     | 3.15E-09       | 4.51               |
| Lrrtm4             | leucine rich repeat transmembrane neuronal 4                     | NM_001134743  | 5.34E-07       | 2.65               |
| Lsamp              | limbic system-associated membrane protein                        | NM_175548     | 3.98E-09       | 2.39               |
| Luzp2              | leucine zipper protein 2                                         | NM_178705     | 2.27E-07       | 3.94               |
| Lypd1              | Ly6 Plaur domain containing 1                                    | NM_145100     | 3.00E-06       | 1.82               |
| Mag                | myelin-associated glycoprotein                                   | NM_010758     | 5.65E-10       | 10.05              |
| Magee1             | melanoma antigen, family E, 1                                    | NM_053201     | 6.59E-07       | 2.69               |
| Magi2              | membrane associated guanylate kinase, WW and PDZ                 | NM_001170745  | 3.79E-07       | 2.70               |
| Mal                | myelin and lymphocyte protein, T cell differentiation protein    | NM_001171187  | 8.84E-08       | 2.88               |
| Mal2               | mal, T cell differentiation protein 2                            | NM_178920     | 4.02E-10       | 8.61               |
| Maneal             | mannosidase, endo-alpha-like                                     | NM_001007573  | 2.04E-06       | 2.13               |
| Map1a              | microtubule-associated protein 1 A                               | NM_001173506  | 2.90E-09       | 8.32               |
| Map1b              | microtubule-associated protein 1B                                | NM_008634     | 2.47E-09       | 2.54               |
| Map2               | microtubule-associated protein 2                                 | NM_001039934  | 1.35E-08       | 4.43               |
| Map2k4             | mitogen-activated protein kinase kinase 4                        | NM_009157     | 2.33E-06       | 2.05               |
| Map3k12            | mitogen-activated protein kinase kinase kinase 12                | NM_001163643  | 1.28E-08       | 2.16               |
| Map6               | microtubule-associated protein 6                                 | NM_001048167  | 5.46E-09       | 2.42               |
| Map6d1             | MAP6 domain containing 1                                         | NM_198599     | 6.60E-07       | 1.85               |
| Map7d2             | MAP7 domain containing 2                                         | NM_001081124  | 9.47E-10       | 5.63               |
| Mapk10             | mitogen-activated protein kinase 10                              | NM_001081567  | 2.31E-11       | 6.45               |
| Mapk4              | mitogen-activated protein kinase 4                               | NM_172632     | 1.29E-08       | 2.99               |
| Mapk8ip1           | mitogen-activated protein kinase 8 interacting protein 1         | NM_001202445  | 5.17E-08       | 2.27               |
| Mapk8ip2           | mitogen-activated protein kinase 8 interacting protein 2         | NM_021921     | 3.03E-09       | 3.37               |
| Mapk9              | mitogen-activated protein kinase 9                               | NM_001163671  | 1.12E-05       | 1.89               |
| Mapt               | microtubule-associated protein tau                               | NM_001038609  | 7.02E-08       | 2.31               |
| Mast1              | microtubule associated serine threonine kinase 1                 | NM_019945     | 3.00E-11       | 4.48               |
| Mbd5               | methyl-CpG binding domain protein 5                              | NM_001290656  | 7.84E-07       | 1.87               |
| Mboat2             | membrane bound O-acyltransferase domain containing 2             | NM_001083341  | 1.53E-06       | 2.17               |
| Mbp                | myelin basic protein                                             | NM_001025245  | 9.81E-12       | 10.34              |
| Mdga2              | MAM domain containing glycosylphosphatidylinositol anchor 2      | NM_001193266  | 2.48E-07       | 2.92               |

**S3 Table: Differential changes in adrenal gene expression in ASP+CGP treated mice relative to ASP diet mice ( $\geq\pm 1.8$  fold change,  $p < 0.05$ ).**

| <i>Gene symbol</i> | <i>Gene name</i>                                                   | <i>RefSeq</i> | <i>P-value</i> | <i>Fold Change</i> |
|--------------------|--------------------------------------------------------------------|---------------|----------------|--------------------|
| Megf9              | multiple EGF-like-domains 9                                        | NM_172694     | 4.15E-06       | 1.86               |
| Mfsd2a             | major facilitator superfamily domain containing 2A                 | NM_029662     | 8.05E-11       | 3.64               |
| Mgat4a             | mannoside acetylglucosaminyltransferase 4, isoenzyme A             | NM_001290801  | 1.25E-05       | 1.98               |
| Mical2             | microtubule associated monooxygenase, calponin and LIM domain      | NM_001193305  | 1.13E-05       | 1.81               |
| Micu3              | mitochondrial calcium uptake family, member 3                      | NM_030110     | 5.42E-06       | 2.29               |
| Mkl2               | MKL myocardin-like 2                                               | NM_001122667  | 2.17E-07       | 1.95               |
| Mlc1               | megalencephalic leukoencephalopathy with subcortical cysts 1       | NM_133241     | 2.76E-08       | 7.11               |
| Mlip               | muscular LMNA-interacting protein                                  | NM_027150     | 1.36E-06       | 2.28               |
| Mllt11             | myeloid lymphoid or mixed-lineage leukemia                         | NM_019914     | 1.31E-07       | 3.59               |
| Mobp               | myelin-associated oligodendrocytic basic protein                   | NM_001039364  | 2.06E-10       | 12.82              |
| Mog                | myelin oligodendrocyte glycoprotein                                | NM_010814     | 3.02E-08       | 5.27               |
| Mt3                | metallothionein 3                                                  | NM_013603     | 3.94E-08       | 2.61               |
| Mtmt7              | myotubularin related protein 7                                     | NM_001040699  | 8.02E-08       | 2.46               |
| Mtss1l             | metastasis suppressor 1-like                                       | NM_198625     | 4.09E-10       | 3.50               |
| Myo5a              | myosin VA                                                          | NM_010864     | 7.45E-07       | 1.96               |
| Myrf               | myelin regulatory factor                                           | NM_001033481  | 8.23E-06       | 2.22               |
| Myt1l              | myelin transcription factor 1-like                                 | NM_001093775  | 1.65E-05       | 2.17               |
| Naa20              | N(alpha)-acetyltransferase 20, NatB catalytic subunit              | NM_001141965  | 2.76E-06       | 1.95               |
| Nalcn              | sodium leak channel, non-selective                                 | NM_177393     | 1.45E-06       | 1.96               |
| Nap1l2             | nucleosome assembly protein 1-like 2                               | NM_008671     | 1.54E-07       | 4.59               |
| Nap1l3             | nucleosome assembly protein 1-like 3                               | NM_138742     | 6.29E-06       | 2.08               |
| Nap1l5             | nucleosome assembly protein 1-like 5                               | NM_021432     | 9.95E-11       | 4.06               |
| Napb               | N-ethylmaleimide sensitive fusion protein $\beta$                  | NM_019632     | 1.28E-11       | 9.07               |
| Nat8l              | N-acetyltransferase 8-like                                         | NM_001001985  | 5.92E-09       | 3.39               |
| Ncam2              | neural cell adhesion molecule 2                                    | NM_010954     | 6.84E-08       | 3.04               |
| Ncan               | neurocan                                                           | NM_007789     | 4.94E-07       | 2.70               |
| Ncdn               | neurochondrin                                                      | NM_011986     | 1.12E-09       | 4.37               |
| Ncs1               | neuronal calcium sensor 1                                          | NM_019681     | 2.49E-09       | 6.78               |
| Ndr3               | N-myc downstream regulated gene 3                                  | NM_013865     | 2.93E-07       | 1.96               |
| Ndr4               | N-myc downstream regulated gene 4                                  | NM_001195006  | 2.09E-11       | 5.78               |
| Ndst3              | N-deacetylase N-sulfotransferase (heparan glucosaminyl) 3          | NM_001293682  | 0.0001826      | 1.92               |
| Ndst4              | N-deacetylase N-sulfotransferase (heparin glucosaminyl) 4          | NM_022565     | 2.25E-07       | 3.33               |
| Necab1             | N-terminal EF-hand calcium binding protein 1                       | NM_178617     | 8.88E-07       | 2.62               |
| Necap1             | NECAP endocytosis associated 1                                     | NM_026267     | 1.13E-07       | 1.98               |
| Nedd4l             | neural precursor cell expressed, developmentally down-regulated 4l | NM_001114386  | 5.13E-08       | 3.46               |
| Nefh               | neurofilament, heavy polypeptide                                   | NM_010904     | 2.64E-06       | 1.86               |
| Nefl               | neurofilament, light polypeptide                                   | NM_010910     | 2.04E-10       | 11.04              |
| Nefm               | neurofilament, medium polypeptide                                  | NM_008691     | 1.87E-08       | 3.49               |
| Negr1              | neuronal growth regulator 1                                        | NM_001039094  | 5.92E-10       | 2.32               |
| Nell1              | NEL-like 1                                                         | NM_001037906  | 2.56E-08       | 3.82               |
| Nell2              | NEL-like 2                                                         | NM_001289653  | 2.25E-11       | 6.52               |
| Neto1              | neuropilin (NRP) and tolloid (TLL)-like 1                          | NM_144946     | 1.19E-10       | 6.80               |
| Neto2              | neuropilin (NRP) and tolloid (TLL)-like 2                          | NM_001081324  | 5.68E-06       | 2.42               |
| Nfasc              | neurofascin                                                        | NM_001160316  | 7.38E-11       | 3.53               |
| Ngb                | neuroglobin                                                        | NM_001294308  | 0.0002786      | 1.82               |
| Nipa1              | non imprinted in Prader-Willi Angelman syndrome 1 homolog          | NM_153578     | 2.21E-06       | 2.15               |
| Nkain2             | Na <sup>+</sup> K <sup>+</sup> transporting ATPase interacting 2   | NM_001013411  | 5.44E-09       | 5.43               |
| Nkain4             | Na <sup>+</sup> K <sup>+</sup> transporting ATPase interacting 4   | NM_001141933  | 1.04E-07       | 2.54               |
| Nkiras1            | NFKB inhibitor interacting Ras-like protein 1                      | NM_023526     | 1.64E-05       | 2.19               |
| Nlgn1              | neuroligin 1                                                       | NM_001163387  | 1.46E-10       | 4.04               |
| Nlgn2              | neuroligin 2                                                       | NM_198862     | 3.02E-07       | 2.10               |

**S3 Table: Differential changes in adrenal gene expression in ASP+CGP treated mice relative to ASP diet mice ( $\geq \pm 1.8$  fold change,  $p < 0.05$ ).**

| <i>Gene symbol</i> | <i>Gene name</i>                                              | <i>RefSeq</i>      | <i>P-value</i> | <i>Fold Change</i> |
|--------------------|---------------------------------------------------------------|--------------------|----------------|--------------------|
| Nlgn3              | neuroligin 3                                                  | NM_172932          | 1.18E-07       | 1.96               |
| Nlrc5              | NLR family, CARD domain containing 5                          | NM_001033207       | 4.44E-05       | -2.07              |
| Nmnat2             | nicotinamide nucleotide adenylyltransferase 2                 | NM_175460          | 8.42E-09       | 5.17               |
| Nnat               | neuronatin                                                    | NM_001291128       | 4.66E-08       | 2.10               |
| Nos1               | nitric oxide synthase 1, neuronal                             | NM_008712          | 2.72E-05       | 1.83               |
| Nova1              | neuro-oncological ventral antigen 1                           | NM_021361          | 2.13E-11       | 10.04              |
| Nptn               | neuroplastin                                                  | NM_001293673       | 2.36E-09       | 1.88               |
| Nptx1              | neuronal pentraxin 1                                          | NM_008730          | 1.30E-06       | 2.23               |
| Nrcam              | neuron-glia-CAM-related cell adhesion molecule                | NM_001146031       | 5.81E-07       | 3.40               |
| Nrg3               | neuregulin 3                                                  | NM_001190187       | 6.77E-06       | 2.00               |
| Nrgn               | neurogranin                                                   | NM_022029          | 5.06E-07       | 3.50               |
| Nrip2              | nuclear receptor interacting protein 2                        | NM_001162858       | 1.24E-06       | 2.51               |
| Nrip3              | nuclear receptor interacting protein 3                        | NM_020610          | 2.31E-08       | 4.17               |
| Nrn1               | neuritin 1                                                    | NM_153529          | 4.49E-08       | 3.39               |
| Nrsn1              | neurensin 1                                                   | NM_009513          | 3.25E-09       | 6.59               |
| Nrsn2              | neurensin 2                                                   | NM_001009948       | 2.27E-09       | 4.00               |
| Nrxn1              | neurexin I                                                    | NM_020252          | 1.61E-08       | 3.48               |
| Nrxn2              | neurexin II                                                   | NM_001205234       | 7.75E-10       | 4.13               |
| Nrxn3              | neurexin III                                                  | ENSMUST00000057634 | 3.00E-09       | 10.10              |
| Nsf                | N-ethylmaleimide sensitive fusion protein                     | NM_008740          | 1.08E-08       | 2.67               |
| Nsg1               | neuron specific gene family member 1                          | NM_010942          | 1.07E-08       | 2.74               |
| Nsg2               | neuron specific gene family member 2                          | XM_006514581       | 8.41E-10       | 2.69               |
| Nsmf               | NMDA receptor synaptonuclear signaling and neuronal migration | NM_001039386       | 2.29E-07       | 1.98               |
| Ntm                | neurotrimin                                                   | NM_172290          | 4.84E-11       | 10.59              |
| Ntng1              | netrin G1                                                     | NM_001163348       | 2.58E-09       | 5.13               |
| Ntrk2              | neurotrophic tyrosine kinase, receptor, type 2                | NM_008745          | 8.08E-10       | 4.80               |
| Ntrk3              | neurotrophic tyrosine kinase, receptor, type 3                | NM_008746          | 1.01E-09       | 2.45               |
| Ntsr1              | neurotensin receptor 1                                        | NM_018766          | 1.31E-06       | 2.15               |
| Ntsr2              | neurotensin receptor 2                                        | NM_008747          | 3.46E-09       | 6.60               |
| Nudt10             | nudix (nucleoside diphosphate linked moiety X)-type motif 10  | NM_001031664       | 1.09E-05       | 3.12               |
| Nudt11             | nudix (nucleoside diphosphate linked moiety X)-type motif 11  | NM_021431          | 0.0011802      | 1.89               |
| Nup210l            | nucleoporin 210-like                                          | NM_029937          | 0.0001202      | -1.93              |
| Nxph1              | neurexophilin 1                                               | NM_008751          | 0.0006201      | 2.14               |
| Ociad2             | OCIA domain containing 2                                      | NM_026950          | 5.51E-07       | 1.96               |
| Ogdhl              | oxoglutarate dehydrogenase-like                               | NM_001081130       | 2.23E-09       | 2.85               |
| Ogfod1             | 2-oxoglutarate and iron-dependent oxygenase domain            | NM_001093757       | 8.09E-08       | 2.66               |
| Ogfr1              | opioid growth factor receptor-like 1                          | NM_001081079       | 2.17E-07       | 2.22               |
| Olf314             | olfactory receptor 314                                        | NM_001011760       | 0.0001693      | -1.99              |
| Olf401             | olfactory receptor 401                                        | NM_146706          | 3.84E-05       | -1.89              |
| Olf91              | olfactory receptor 91                                         | NM_182714          | 0.0004257      | -1.85              |
| Olig1              | oligodendrocyte transcription factor 1                        | NM_016968          | 1.24E-09       | 6.53               |
| Olig2              | oligodendrocyte transcription factor 2                        | NM_016967          | 6.36E-06       | 2.72               |
| Omg                | oligodendrocyte myelin glycoprotein                           | NM_019409          | 9.12E-08       | 3.07               |
| Opalin             | oligodendrocytic myelin paranodal and inner loop protein      | NM_153520          | 1.86E-07       | 3.46               |
| Opcml              | opioid binding protein cell adhesion molecule-like            | NM_177906          | 2.44E-10       | 9.55               |
| Opr1               | opioid receptor-like 1                                        | NM_001252565       | 1.72E-08       | 2.94               |
| Oscp1              | organic solute carrier partner 1                              | NM_172701          | 2.76E-06       | 2.03               |
| Otud7a             | OTU domain containing 7A                                      | NM_130880          | 5.29E-05       | 2.00               |
| Oxt                | oxytocin                                                      | NM_011025          | 1.05E-06       | 3.35               |
| Paccin1            | protein kinase C and casein kinase substrate in neurons 1     | NM_001286743       | 5.78E-09       | 3.71               |
| Pak1               | p21 protein (Cdc42 Rac)-activated kinase 1                    | NM_011035          | 2.46E-08       | 2.93               |

**S3 Table: Differential changes in adrenal gene expression in ASP+CGP treated mice relative to ASP diet mice ( $\geq\pm 1.8$  fold change,  $p < 0.05$ ).**

| <i>Gene symbol</i> | <i>Gene name</i>                                             | <i>RefSeq</i> | <i>P-value</i> | <i>Fold Change</i> |
|--------------------|--------------------------------------------------------------|---------------|----------------|--------------------|
| Pcdh10             | protocadherin 10                                             | NM_001098171  | 1.49E-07       | 3.23               |
| Pcdh11x            | protocadherin 11 X-linked                                    | NM_001271809  | 5.29E-07       | 4.19               |
| Pcdh17             | protocadherin 17                                             | NM_001013753  | 1.60E-06       | 2.50               |
| Pcdh19             | protocadherin 19                                             | NM_001105245  | 3.56E-05       | 2.35               |
| Pcdh7              | protocadherin 7                                              | NM_001122758  | 1.26E-07       | 2.54               |
| Pcdh9              | protocadherin 9                                              | NM_001081377  | 3.52E-10       | 3.93               |
| Pclo               | piccolo (presynaptic cytomatrix protein)                     | NM_001110796  | 6.66E-05       | 1.80               |
| Pcnx12             | pecanex-like 2 (Drosophila)                                  | NM_175561     | 1.58E-06       | 2.42               |
| Pcolce2            | procollagen C-endopeptidase enhancer 2                       | NM_029620     | 1.62E-05       | 1.83               |
| Pcp4               | Purkinje cell protein 4                                      | NM_008791     | 3.98E-10       | 4.88               |
| Pcp4l1             | Purkinje cell protein 4-like 1                               | NM_025557     | 1.18E-07       | 1.94               |
| Pcsk2              | proprotein convertase subtilisin kexin type 2                | NM_008792     | 1.29E-11       | 6.49               |
| Pde1b              | phosphodiesterase 1B, Ca <sup>2+</sup> -calmodulin dependent | NM_001285890  | 5.19E-09       | 3.28               |
| Pde4b              | phosphodiesterase 4B, cAMP specific                          | NM_001177980  | 1.70E-10       | 4.04               |
| Pde4d              | phosphodiesterase 4D, cAMP specific                          | NM_011056     | 6.61E-05       | 1.89               |
| Pde7b              | phosphodiesterase 7B                                         | NM_013875     | 6.33E-08       | 1.97               |
| Pde9a              | phosphodiesterase 9A                                         | NM_001163748  | 7.99E-06       | 2.00               |
| Pdxk               | pyridoxal (pyridoxine, vitamin B6) kinase                    | NM_172134     | 3.72E-08       | 2.07               |
| Pdpx               | pyridoxal (pyridoxine, vitamin B6) phosphatase               | NM_020271     | 4.14E-10       | 4.71               |
| Pea15a             | phosphoprotein enriched in astrocytes 15A                    | NM_011063     | 8.52E-09       | 2.42               |
| Peg3               | paternally expressed 3                                       | NM_008817     | 2.14E-10       | 3.42               |
| Penk               | preproenkephalin                                             | NM_001002927  | 1.17E-08       | 2.10               |
| Pex5l              | peroxisomal biogenesis factor 5-like                         | NM_001163516  | 3.49E-07       | 2.49               |
| Pfkm               | phosphofructokinase, muscle                                  | NM_001163487  | 1.10E-09       | 2.25               |
| Pfkp               | phosphofructokinase, platelet                                | NM_001291071  | 2.87E-07       | 2.11               |
| Pfn2               | profilin 2                                                   | NM_019410     | 6.47E-10       | 2.86               |
| Pgap1              | post-GPI attachment to proteins 1                            | NM_001163314  | 4.65E-06       | 2.91               |
| Pglyrp1            | peptidoglycan recognition protein 1                          | NM_009402     | 0.0001404      | 1.89               |
| Pgm2l1             | phosphoglucomutase 2-like 1                                  | NM_027629     | 3.46E-08       | 3.49               |
| Phactr1            | phosphatase and actin regulator 1                            | NM_001005740  | 7.64E-09       | 3.08               |
| Phlpp1             | PH domain and leucine rich repeat protein phosphatase 1      | NM_133821     | 3.28E-08       | 2.80               |
| Phyhip             | phytanoyl-CoA hydroxylase interacting protein                | NM_145981     | 5.48E-10       | 5.80               |
| Phyhipl            | phytanoyl-CoA hydroxylase interacting protein-like           | NM_001162846  | 7.44E-11       | 9.15               |
| Pi4ka              | phosphatidylinositol 4-kinase, catalytic, alpha polypeptide  | NM_001001983  | 2.55E-07       | 1.82               |
| Pigz               | phosphatidylinositol glycan anchor biosynthesis, class Z     | NM_172822     | 2.96E-06       | 1.98               |
| Pip4k2a            | phosphatidylinositol-5-phosphate 4-kinase, type II, alpha    | NM_008845     | 1.93E-07       | 1.89               |
| Pip4k2b            | phosphatidylinositol-5-phosphate 4-kinase, type II, beta     | NM_054051     | 1.57E-06       | 1.84               |
| Pitpnc1            | phosphatidylinositol transfer protein, cytoplasmic 1         | NM_145823     | 6.33E-06       | 2.19               |
| Pja2               | praja 2, RING-H2 motif containing                            | NM_001025309  | 1.04E-06       | 1.95               |
| Pkia               | protein kinase inhibitor, alpha                              | NM_008862     | 5.99E-09       | 4.45               |
| Pkp4               | plakophilin 4                                                | NM_026361     | 4.01E-08       | 2.49               |
| Pla2g2e            | phospholipase A2, group IIE                                  | NM_012044     | 2.13E-06       | -1.85              |
| Pla2g7             | phospholipase A2, group VII (platelet-activating factor)     | NM_013737     | 1.36E-08       | 1.92               |
| Plagl1             | pleiomorphic adenoma gene-like 1                             | NM_009538     | 5.81E-06       | 1.84               |
| Plb1               | phospholipase B1                                             | NM_001081407  | 0.0006584      | -1.83              |
| Plcx2              | phosphatidylinositol-specific phospholipase C, X2            | NM_001134480  | 6.43E-06       | 2.05               |
| Pleckhb1           | pleckstrin homology domain containing, family B (evectins)   | NM_001163182  | 5.54E-12       | 8.98               |
| Plekhg1            | pleckstrin homology domain containing, family G              | NM_001033253  | 1.24E-06       | 2.13               |
| Plip               | plasma membrane proteolipid                                  | NM_026385     | 1.61E-05       | 2.67               |
| Plp1               | proteolipid protein (myelin) 1                               | NM_001290561  | 2.35E-11       | 19.58              |
| Plxnc1             | plexin C1                                                    | NM_018797     | 5.20E-06       | 2.50               |

**S3 Table: Differential changes in adrenal gene expression in ASP+CGP treated mice relative to ASP diet mice ( $\geq \pm 1.8$  fold change,  $p < 0.05$ ).**

| <i>Gene symbol</i> | <i>Gene name</i>                                             | <i>RefSeq</i> | <i>P-value</i> | <i>Fold Change</i> |
|--------------------|--------------------------------------------------------------|---------------|----------------|--------------------|
| Pmch               | pro-melanin-concentrating hormone                            | NM_029971     | 4.43E-10       | 17.52              |
| Pnck               | pregnancy upregulated non-ubiquitously expressed CaM kinase  | NM_001199351  | 3.88E-08       | 3.00               |
| Pnkd               | paroxysmal nonkinesinogenic dyskinesia                       | NM_019999     | 2.10E-08       | 2.61               |
| Pnma2              | paraneoplastic antigen MA2                                   | NM_175498     | 2.49E-06       | 1.89               |
| Pnma3              | paraneoplastic antigen MA3                                   | NM_153169     | 1.38E-05       | 2.35               |
| Pnmal1             | PNMA-like 1                                                  | NM_001007569  | 7.45E-08       | 2.86               |
| Pnmal2             | PNMA-like 2                                                  | NM_001099636  | 9.01E-08       | 3.04               |
| Pou3f4             | POU domain, class 3, transcription factor 4                  | NM_008901     | 6.77E-07       | 1.89               |
| Ppargc1a           | peroxisome proliferative activated receptor, gamma           | NM_008904     | 1.61E-09       | 3.95               |
| Ppp1r12b           | protein phosphatase 1, regulatory (inhibitor) subunit 12B    | NM_001081307  | 1.10E-06       | 1.93               |
| Ppp1r16b           | protein phosphatase 1, regulatory (inhibitor) subunit 16B    | NM_001159662  | 8.18E-09       | 2.21               |
| Ppp1r1b            | protein phosphatase 1, regulatory (inhibitor) subunit 1B     | NM_144828     | 7.26E-07       | 2.66               |
| Ppp1r3c            | protein phosphatase 1, regulatory (inhibitor) subunit 3C     | NM_016854     | 1.45E-05       | 2.20               |
| Ppp1r9b            | protein phosphatase 1, regulatory subunit 9B                 | NM_172261     | 1.81E-08       | 1.97               |
| Ppp2r2b            | protein phosphatase 2, regulatory subunit B, beta            | NR_073583     | 1.88E-07       | 2.37               |
| Ppp2r2c            | protein phosphatase 2, regulatory subunit B, gamma           | NM_172994     | 2.08E-09       | 6.04               |
| Ppp2r5c            | protein phosphatase 2, regulatory subunit B, gamma           | NM_001135001  | 7.98E-06       | 1.97               |
| Ppp3ca             | protein phosphatase 3, catalytic subunit, alpha isoform      | NM_001293622  | 2.23E-09       | 2.67               |
| Ppy                | pancreatic polypeptide                                       | NM_008918     | 0.0007232      | -1.87              |
| Praf2              | PRA1 domain family 2                                         | NM_138602     | 4.00E-07       | 1.93               |
| Prepl              | prolyl endopeptidase-like                                    | NM_001163622  | 4.97E-10       | 5.58               |
| Prg4               | proteoglycan 4                                               | NM_001110146  | 1.20E-06       | 2.23               |
| Prickle2           | prickle homolog 2 (Drosophila)                               | NM_001081146  | 1.44E-06       | 2.65               |
| Prkacb             | protein kinase, cAMP dependent, catalytic, beta              | NM_001164198  | 8.49E-10       | 1.89               |
| Prkar1b            | protein kinase, cAMP dependent regulatory, type I beta       | NM_001253890  | 3.73E-11       | 3.09               |
| Prkca              | protein kinase C, alpha                                      | NM_011101     | 2.08E-07       | 2.20               |
| Prkcb              | protein kinase C, beta                                       | NM_008855     | 8.55E-09       | 3.56               |
| Prkce              | protein kinase C, epsilon                                    | NM_011104     | 5.19E-07       | 2.38               |
| Prkcz              | protein kinase C, zeta                                       | NM_001039079  | 1.65E-10       | 5.35               |
| Prlh               | prolactin releasing hormone                                  | NM_001101647  | 0.0017631      | -1.81              |
| Prmt8              | protein arginine N-methyltransferase 8                       | NM_201371     | 6.80E-08       | 2.32               |
| Prnp               | prion protein                                                | NM_001278256  | 1.21E-10       | 2.17               |
| Prp2               | proline rich protein 2                                       | NM_031499     | 0.0012366      | -2.31              |
| Prrt2              | proline-rich transmembrane protein 2                         | NM_001102563  | 9.76E-09       | 2.51               |
| Psd                | pleckstrin and Sec7 domain containing                        | NM_028627     | 8.70E-09       | 2.41               |
| Psd2               | pleckstrin and Sec7 domain containing 2                      | NM_001289602  | 1.58E-08       | 3.57               |
| Ptbp2              | polypyrimidine tract binding protein 2                       | NM_019550     | 2.25E-08       | 1.90               |
| Ptch1              | patched homolog 1                                            | NM_008957     | 7.59E-09       | 2.05               |
| Ptchd1             | patched domain containing 1                                  | NM_001093750  | 1.24E-05       | 2.13               |
| Ptgds              | prostaglandin D2 synthase (brain)                            | NM_008963     | 2.65E-11       | 17.44              |
| Ptk2b              | PTK2 protein tyrosine kinase 2 beta                          | NM_001162365  | 4.22E-07       | 2.30               |
| Ptpn5              | protein tyrosine phosphatase, non-receptor type 5            | NM_001163565  | 1.67E-05       | 2.65               |
| Ptpro              | protein tyrosine phosphatase, receptor type, O               | NM_001164401  | 5.99E-09       | 2.98               |
| Ptprt              | protein tyrosine phosphatase, receptor type, T               | NM_001291149  | 8.34E-06       | 2.05               |
| Ptprz1             | protein tyrosine phosphatase, receptor type Z, polypeptide 1 | NM_001081306  | 2.63E-08       | 6.49               |
| Purb               | purine rich element binding protein B                        | NM_011221     | 3.78E-06       | 2.12               |
| Pvalb              | parvalbumin                                                  | NM_013645     | 2.44E-08       | 4.62               |
| Pydc4              | pyrin domain containing 4                                    | NM_001177349  | 0.0006518      | -2.00              |
| Pygb               | brain glycogen phosphorylase                                 | NM_153781     | 1.36E-06       | 1.89               |
| Rab11fip4          | RAB11 family interacting protein 4 (class II)                | NM_175543     | 2.93E-06       | 2.07               |
| Rab15              | RAB15, member RAS oncogene family                            | NM_134050     | 8.72E-11       | 3.57               |

**S3 Table: Differential changes in adrenal gene expression in ASP+CGP treated mice relative to ASP diet mice ( $\geq \pm 1.8$  fold change,  $p < 0.05$ ).**

| <i>Gene symbol</i> | <i>Gene name</i>                                           | <i>RefSeq</i> | <i>P-value</i> | <i>Fold Change</i> |
|--------------------|------------------------------------------------------------|---------------|----------------|--------------------|
| Rab39b             | RAB39B, member RAS oncogene family                         | NM_175122     | 1.52E-05       | 2.11               |
| Rab3a              | RAB3A, member RAS oncogene family                          | NM_001166399  | 1.14E-09       | 2.30               |
| Rab3c              | RAB3C, member RAS oncogene family                          | NM_023852     | 1.22E-06       | 2.16               |
| Rab6b              | RAB6B, member RAS oncogene family                          | NM_173781     | 1.17E-11       | 3.68               |
| Rab9b              | RAB9B, member RAS oncogene family                          | NM_176971     | 3.25E-06       | 2.23               |
| Rac3               | RAS-related C3 botulinum substrate 3                       | NM_133223     | 9.13E-10       | 2.57               |
| Ralgps1            | Ral GEF with PH domain and SH3 binding motif 1             | NM_001290570  | 5.40E-07       | 2.13               |
| Raly1              | RALY RNA binding protein-like                              | NM_001163328  | 1.71E-07       | 3.81               |
| Rangap1            | RAN GTPase activating protein 1                            | NM_011241     | 9.27E-08       | 1.89               |
| Rap1gds1           | RAP1, GTP-GDP dissociation stimulator 1                    | NM_001040690  | 3.89E-08       | 2.03               |
| Rapgef2            | Rap guanine nucleotide exchange factor (GEF) 2             | NM_001099624  | 7.18E-07       | 1.96               |
| Rapgef1            | Rap guanine nucleotide exchange factor (GEF)-like 1        | NM_001080925  | 3.83E-06       | 2.45               |
| Rasd2              | RASD family, member 2                                      | NM_029182     | 3.39E-06       | 2.95               |
| Rasgef1a           | RasGEF domain family, member 1A                            | NM_027526     | 1.95E-09       | 10.98              |
| Rasgrf1            | RAS protein-specific guanine nucleotide-releasing factor 1 | NM_011245     | 5.57E-11       | 2.42               |
| Rasgrf2            | RAS protein-specific guanine nucleotide-releasing factor 2 | NM_009027     | 3.83E-10       | 4.91               |
| Rasgrp1            | RAS guanyl releasing protein 1                             | NM_011246     | 1.12E-10       | 11.98              |
| Rbbp6              | retinoblastoma binding protein 6                           | NM_175023     | 0.0001944      | 1.83               |
| Rbfox1             | RNA binding protein, fox-1 homolog (C. elegans) 1          | NM_021477     | 1.33E-09       | 5.73               |
| Rbfox3             | RNA binding protein, fox-1 homolog (C. elegans) 3          | NM_001039167  | 1.88E-09       | 3.85               |
| Rcan2              | regulator of calcineurin 2                                 | NM_001286654  | 3.84E-12       | 7.18               |
| Reep1              | receptor accessory protein 1                               | NM_178608     | 3.99E-07       | 2.26               |
| Rel2               | RELT-like 2                                                | NM_153793     | 1.93E-08       | 3.25               |
| Reln               | reelin                                                     | NM_011261     | 7.24E-07       | 1.98               |
| Reps2              | RALBP1 associated Eps domain containing protein 2          | NM_001290633  | 6.57E-09       | 4.11               |
| Ret                | ret proto-oncogene                                         | NM_001080780  | 2.94E-08       | 2.31               |
| Rgs10              | regulator of G-protein signalling 10                       | NM_026418     | 1.32E-05       | 2.01               |
| Rgs7               | regulator of G protein signaling 7                         | NM_001199003  | 1.90E-08       | 2.94               |
| Rgs7bp             | regulator of G-protein signalling 7 binding protein        | NM_029879     | 3.07E-09       | 4.17               |
| Rgs8               | regulator of G-protein signaling 8                         | NM_026380     | 6.37E-09       | 3.34               |
| Rhobtb2            | Rho-related BTB domain containing 2                        | NM_153514     | 4.04E-09       | 2.32               |
| Rhof               | ras homolog gene family, member f                          | NM_175092     | 2.48E-05       | 2.07               |
| Rimbp2             | RIMS binding protein 2                                     | NM_001081388  | 6.49E-06       | 1.91               |
| Rimklb             | ribosomal modification protein rimK-like family member B   | NM_027664     | 1.82E-08       | 8.26               |
| Rims1              | regulating synaptic membrane exocytosis 1                  | NM_001012623  | 3.12E-06       | 2.73               |
| Rit2               | Ras-like without CAAX 2                                    | NM_009065     | 6.92E-09       | 3.88               |
| Rnd2               | Rho family GTPase 2                                        | NM_009708     | 3.24E-08       | 3.51               |
| Rnf14              | ring finger protein 14                                     | NM_001164621  | 4.96E-08       | 2.18               |
| Rnf157             | ring finger protein 157                                    | NM_027258     | 1.47E-10       | 4.25               |
| Rnf208             | ring finger protein 208                                    | NM_176834     | 7.57E-09       | 2.50               |
| Rny1               | RNA, Y1 small cytoplasmic, Ro-associated                   | NR_004419     | 0.0001502      | 1.97               |
| Rph3a              | rabphilin 3A                                               | NM_011286     | 1.04E-07       | 2.54               |
| Rpp25              | ribonuclease P MRP 25 subunit                              | NM_133982     | 2.98E-07       | 2.62               |
| Rragb              | Ras-related GTP binding B                                  | NM_001004154  | 3.42E-06       | 2.52               |
| Rtn1               | reticulon 1                                                | NM_001007596  | 1.53E-10       | 5.97               |
| Rtn2               | reticulon 2 (Z-band associated protein)                    | NM_001025364  | 1.48E-08       | 2.10               |
| Rufy3              | RUN and FYVE domain containing 3                           | NM_001289775  | 2.78E-08       | 2.48               |
| Runx1t1            | runt-related transcription factor 1; translocated to, 1    | NM_001111026  | 1.37E-07       | 2.49               |
| Rwdd2a             | RWD domain containing 2A                                   | NM_001145968  | 3.86E-08       | 2.84               |
| Rxrg               | retinoid X receptor gamma                                  | NM_001159731  | 1.36E-07       | 2.32               |
| S100b              | S100 protein, beta polypeptide, neural                     | NM_009115     | 8.61E-08       | 4.29               |



**S3 Table: Differential changes in adrenal gene expression in ASP+CGP treated mice relative to ASP diet mice ( $\geq \pm 1.8$  fold change,  $p < 0.05$ ).**

| <i>Gene symbol</i> | <i>Gene name</i>                                                    | <i>RefSeq</i> | <i>P-value</i> | <i>Fold Change</i> |
|--------------------|---------------------------------------------------------------------|---------------|----------------|--------------------|
| Sbpl               | spermine binding protein-like                                       | NM_001077421  | 3.05E-05       | -1.85              |
| Scamp1             | secretory carrier membrane protein 1                                | NM_029153     | 1.40E-08       | 1.80               |
| Scamp5             | secretory carrier membrane protein 5                                | NM_020270     | 1.35E-09       | 3.38               |
| Sccpdh             | saccharopine dehydrogenase (putative)                               | NM_178653     | 1.15E-06       | 2.11               |
| Scg3               | secretogranin III                                                   | NM_001164790  | 8.43E-07       | 2.67               |
| Scn1a              | sodium channel, voltage-gated, type I, alpha                        | NM_018733     | 2.97E-05       | 3.07               |
| Scn1b              | sodium channel, voltage-gated, type I, beta                         | NM_011322     | 6.10E-08       | 2.89               |
| Scn2a1             | sodium channel, voltage-gated, type II, alpha 1                     | NM_001099298  | 2.43E-11       | 15.60              |
| Scn2b              | sodium channel, voltage-gated, type II, beta                        | NM_001014761  | 2.48E-10       | 4.70               |
| Scn3a              | sodium channel, voltage-gated, type III, alpha                      | NM_018732     | 2.73E-06       | 2.27               |
| Scn3b              | sodium channel, voltage-gated, type III, beta                       | NM_001083917  | 6.27E-09       | 2.88               |
| Scn4b              | sodium channel, type IV, beta                                       | NM_001013390  | 7.88E-06       | 2.37               |
| Scn8a              | sodium channel, voltage-gated, type VIII, alpha                     | NM_001077499  | 1.67E-08       | 3.33               |
| Scoc               | short coiled-coil protein                                           | NM_001039137  | 5.48E-05       | 2.26               |
| Scrg1              | scrapie responsive gene 1                                           | NM_009136     | 1.34E-09       | 7.46               |
| Scrn1              | secernin 1                                                          | NM_027268     | 5.29E-09       | 2.09               |
| Scrt1              | scratch homolog 1, zinc finger protein (Drosophila)                 | NM_130893     | 1.36E-07       | 2.26               |
| Sema6a             | sema domain, transmembrane domain (TM), and cytoplasmic domain,     | NM_018744     | 1.07E-06       | 1.89               |
| Sema6d             | sema domain, transmembrane domain (TM), and cytoplasmic 6d          | NM_001290997  | 2.74E-08       | 2.34               |
| Sept3              | septin 3                                                            | NM_011889     | 9.88E-10       | 7.28               |
| Sept4              | septin 4                                                            | NM_001284392  | 7.59E-08       | 2.28               |
| Serpine2           | serine (or cysteine) peptidase inhibitor, clade E, member 2         | NM_009255     | 2.70E-09       | 4.15               |
| Sez6               | seizure related gene 6                                              | NM_001291225  | 1.30E-06       | 2.53               |
| Sez6l              | seizure related 6 homolog like                                      | NM_001253916  | 1.43E-08       | 2.39               |
| Sez6l2             | seizure related 6 homolog like 2                                    | NM_001252566  | 8.20E-09       | 2.33               |
| Sgip1              | SH3-domain GRB2-like (endophilin) interacting protein 1             | NM_001285852  | 3.50E-12       | 3.75               |
| Sgsm1              | small G protein signaling modulator 1                               | NM_001162965  | 3.76E-08       | 2.10               |
| Sgtb               | small glutamine-rich tetratricopeptide repeat (TPR)-containing      | NM_144838     | 6.25E-08       | 2.32               |
| Sh3gl2             | SH3-domain GRB2-like 2                                              | NM_019535     | 1.49E-07       | 2.14               |
| Shank1             | SH3 ankyrin domain gene 1                                           | NM_001034115  | 6.77E-10       | 4.81               |
| Shc3               | src homology 2 domain-containing transforming protein C3            | NM_009167     | 3.13E-10       | 6.55               |
| Shd                | src homology 2 domain-containing transforming protein D             | NM_001159523  | 2.45E-06       | 1.99               |
| Shisa6             | shisa homolog 6 (Xenopus laevis)                                    | NM_001034874  | 7.48E-06       | 3.02               |
| Shisa7             | shisa homolog 7 (Xenopus laevis)                                    | NM_001290291  | 4.92E-06       | 1.96               |
| Sipa1l1            | signal-induced proliferation-associated 1 like 1                    | NM_001167983  | 3.44E-07       | 2.05               |
| Slain1             | SLAIN motif family, member 1                                        | NM_198014     | 2.02E-06       | 3.73               |
| Slc12a5            | solute carrier family 12, member 5                                  | NM_020333     | 1.77E-11       | 6.22               |
| Slc14a1            | solute carrier family 14 (urea transporter), member 1               | NM_001171010  | 1.01E-06       | 2.59               |
| Slc17a6            | solute carrier family 17                                            | NM_080853     | 6.41E-08       | 8.21               |
| Slc1a1             | solute carrier family 1 (neuronal epithelial high affinity glu)     | NM_009199     | 5.91E-09       | 4.43               |
| Slc1a2             | solute carrier family 1 (glial high affinity glutamate transport 2) | NM_011393     | 6.92E-11       | 13.09              |
| Slc1a3             | solute carrier family 1 (glial high affinity glutamate transport 3) | NM_148938     | 1.99E-09       | 5.25               |
| Slc20a1            | solute carrier family 20, member 1                                  | NM_001159593  | 2.15E-07       | 2.38               |
| Slc22a17           | solute carrier family 22 (organic cation transporter), member       | NM_021551     | 2.12E-08       | 2.28               |
| Slc22a23           | solute carrier family 22, member 23                                 | NM_001033167  | 2.06E-07       | 2.55               |
| Slc22a8            | solute carrier family 22 (organic anion transporter), member        | NM_001164634  | 1.14E-06       | 2.25               |
| Slc24a2            | solute carrier family 24 (sodium potassium                          | NM_001110240  | 3.57E-09       | 2.64               |
| Slc24a3            | solute carrier family 24 (sodium potassium                          | NM_053195     | 1.45E-08       | 4.20               |
| Slc25a12           | solute carrier family 25 (mitochondrial carrier, Aralar)            | NM_172436     | 2.32E-06       | 1.84               |
| Slc25a18           | solute carrier family 25 (mitochondrial carrier), member 18         | NM_001081048  | 8.89E-09       | 5.92               |
| Slc25a4            | solute carrier family 25 (mitochondrial carrier), member 18         | NM_007450     | 1.13E-07       | 1.93               |

**S3 Table: Differential changes in adrenal gene expression in ASP+CGP treated mice relative to ASP diet mice ( $\geq \pm 1.8$  fold change,  $p < 0.05$ ).**

| <i>Gene symbol</i> | <i>Gene name</i>                                                  | <i>RefSeq</i> | <i>P-value</i> | <i>Fold Change</i> |
|--------------------|-------------------------------------------------------------------|---------------|----------------|--------------------|
| Slc2a1             | solute carrier family 2 (facilitated glucose transporter)         | NM_011400     | 2.27E-08       | 1.97               |
| Slc2a13            | solute carrier family 2 (facilitated glucose transporter)         | NM_001033633  | 5.97E-08       | 3.69               |
| Slc2a3             | solute carrier family 2 (facilitated glucose transporter)         | NM_011401     | 5.15E-09       | 2.12               |
| Slc32a1            | solute carrier family 32 (GABA vesicular transporter), member 1   | NM_009508     | 6.06E-08       | 3.11               |
| Slc34a1            | solute carrier family 34 (sodium phosphate), member 1             | NM_011392     | 3.08E-05       | -1.90              |
| Slc35e3            | solute carrier family 35, member E3                               | NM_029875     | 9.20E-06       | 2.14               |
| Slc35f1            | solute carrier family 35, member F1                               | NM_178675     | 6.30E-09       | 4.13               |
| Slc35f3            | solute carrier family 35, member F3                               | NM_175434     | 3.08E-06       | 1.96               |
| Slc35g2            | solute carrier family 35, member G2                               | NM_001101483  | 1.43E-05       | 1.95               |
| Slc38a1            | solute carrier family 38, member 1                                | AF184240      | 1.47E-10       | 3.75               |
| Slc38a3            | solute carrier family 38, member 3                                | NM_001199217  | 2.32E-09       | 2.81               |
| Slc39a12           | solute carrier family 39 (zinc transporter), member 12            | NM_001012305  | 7.78E-08       | 2.69               |
| Slc39a5            | solute carrier family 39 (metal ion transporter), member 5        | NM_028051     | 1.95E-05       | -1.89              |
| Slc4a10            | solute carrier family 4, sodium bicarbonate cotransporter         | NM_001242378  | 2.63E-08       | 3.70               |
| Slc4a4             | solute carrier family 4 (anion exchanger), member 4               | NM_001136260  | 3.00E-09       | 2.97               |
| Slc4a8             | solute carrier family 4 (anion exchanger), member 8               | NM_021530     | 2.21E-06       | 1.90               |
| Slc6a1             | solute carrier family 6 (neurotransmitter trans, GABA), m1        | NM_178703     | 4.61E-11       | 23.11              |
| Slc6a11            | solute carrier family 6 (neurotransmitter transporter, GABA)      | NM_172890     | 2.75E-13       | 38.37              |
| Slc6a13            | solute carrier family 6 (neurotransmitter transporter, GABA)      | NM_144512     | 6.20E-07       | 2.48               |
| Slc6a15            | solute carrier family 6 (neurotransmitter transporter), memb      | NM_001252330  | 3.00E-06       | 2.39               |
| Slc6a17            | solute carrier family 6 (neurotransmitter transporter)            | NM_001293689  | 5.18E-10       | 4.07               |
| Slc6a3             | solute carrier family 6 (neurotransmitter, dopamine)              | NM_010020     | 3.46E-08       | 6.15               |
| Slc6a7             | solute carrier family 6 (neurotransmitter transporter, L-proline) | NM_201353     | 5.04E-07       | 2.14               |
| Slc6a9             | solute carrier family 6 (neurotransmitter transporter, glycine),  | NM_008135     | 2.15E-07       | 1.99               |
| Slc7a11            | solute carrier family 7 (cationic amino acid transporter          | NM_011990     | 1.18E-07       | 3.08               |
| Slc7a14            | solute carrier family 7 (cationic amino acid transporter, y+ sy   | NM_172861     | 3.33E-08       | 2.72               |
| Slc7a3             | solute carrier family 7 (cationic amino acid transporter, y+ sy   | NM_007515     | 2.62E-05       | 2.55               |
| Slc8a1             | solute carrier family 8 (sodium calcium exchanger), member 1      | NM_001112798  | 4.54E-06       | 1.82               |
| Slc8a3             | solute carrier family 8 (sodium calcium exchanger), member 3      | NM_001167920  | 7.95E-09       | 2.10               |
| Slc9a6             | solute carrier family 9 (sodium hydrogen exchanger), member 6     | NM_172780     | 9.36E-07       | 1.82               |
| Slco1a4            | solute carrier organic anion transporter family, member 1a4       | NM_030687     | 5.47E-06       | 3.34               |
| Slco1c1            | solute carrier organic anion transporter family, member 1c1       | NM_001177772  | 2.21E-06       | 2.36               |
| Slitrk1            | SLIT and NTRK-like family, member 1                               | NM_199065     | 7.65E-05       | 2.82               |
| Slitrk3            | SLIT and NTRK-like family, member 3                               | NM_198864     | 6.62E-08       | 5.32               |
| Slmo1              | slowmo homolog 1 (Drosophila)                                     | NM_144867     | 1.12E-05       | 1.85               |
| Sms                | spermine synthase                                                 | NM_009214     | 4.58E-06       | 2.57               |
| Snap25             | synaptosomal-associated protein 25                                | NM_001291056  | 3.73E-11       | 3.74               |
| Snap47             | synaptosomal-associated protein, 47                               | NM_144521     | 4.65E-08       | 1.90               |
| Snap91             | synaptosomal-associated protein 91                                | NM_001277982  | 2.00E-08       | 2.02               |
| Snca               | synuclein, alpha                                                  | NM_001042451  | 1.63E-08       | 2.55               |
| Sncb               | synuclein, beta                                                   | NM_033610     | 3.87E-10       | 5.01               |
| Snhg11             | small nucleolar RNA host gene 11                                  | NM_175692     | 1.19E-08       | 3.89               |
| Snord116           | small nucleolar RNA, C D box 116                                  | NR_002895     | 5.11E-09       | 4.34               |
| Snrpn              | small nuclear ribonucleoprotein N                                 | NM_001082961  | 2.88E-10       | 5.11               |
| Sntg1              | syntrophin, gamma 1                                               | NM_001290390  | 2.33E-05       | 1.81               |
| Snx32              | sorting nexin 32                                                  | NM_001024560  | 1.97E-07       | 2.51               |
| Sobp               | sine oculis-binding protein homolog (Drosophila)                  | NM_175407     | 2.52E-09       | 2.31               |
| Sorcs3             | sortilin-related VPS10 domain containing receptor 3               | NM_025696     | 1.08E-05       | 2.46               |
| Sort1              | sortilin-related receptor, LDLR class A repeats-containing        | NM_011436     | 1.72E-07       | 1.99               |
| Sort1              | sortilin 1                                                        | NM_001271599  | 2.13E-07       | 2.01               |
| Sowaha             | sosondawah ankyrin repeat domain family member A                  | NM_183173     | 4.95E-07       | 2.50               |

**S3 Table: Differential changes in adrenal gene expression in ASP+CGP treated mice relative to ASP diet mice ( $\geq\pm 1.8$  fold change,  $p < 0.05$ ).**

| <i>Gene symbol</i> | <i>Gene name</i>                                               | <i>RefSeq</i> | <i>P-value</i> | <i>Fold Change</i> |
|--------------------|----------------------------------------------------------------|---------------|----------------|--------------------|
| Sox2               | SRY (sex determining region Y)-box 2                           | NM_011443     | 4.02E-06       | 3.99               |
| Sox9               | SRY (sex determining region Y)-box 9                           | NM_011448     | 3.41E-07       | 2.01               |
| Sparcl1            | SPARC-like 1                                                   | NM_010097     | 2.10E-10       | 6.83               |
| Sphkap             | SPHK1 interactor, AKAP domain containing                       | NM_172430     | 3.83E-07       | 2.27               |
| Spire1             | spire homolog 1 (Drosophila)                                   | NM_176832     | 1.45E-07       | 2.47               |
| Spock1             | sparc osteonectin, cwcv and kazal-like domains proteoglycan 1  | NM_001166463  | 6.31E-09       | 2.70               |
| Spock2             | sparc osteonectin, cwcv and kazal-like domains proteoglycan 2  | NM_052994     | 7.63E-08       | 2.35               |
| Spock3             | sparc osteonectin, cwcv and kazal-like domains proteoglycan 3  | NM_001252620  | 2.99E-08       | 2.40               |
| Spon1              | spondin 1, (f-spondin) extracellular matrix protein            | NM_145584     | 1.15E-07       | 2.01               |
| Sprn               | shadow of prion protein                                        | NM_183147     | 3.60E-07       | 2.75               |
| Sprr1a             | small proline-rich protein 1A                                  | NM_009264     | 8.61E-06       | -1.95              |
| Spry3              | sprouty homolog 3 (Drosophila)                                 | NM_001030293  | 5.90E-05       | 1.87               |
| Sptbn2             | spectrin beta, non-erythrocytic 2                              | NM_021287     | 1.35E-08       | 1.84               |
| Srgap1             | SLIT-ROBO Rho GTPase activating protein 1                      | NM_001081037  | 1.45E-07       | 2.34               |
| Srgap3             | SLIT-ROBO Rho GTPase activating protein 3                      | NM_080448     | 1.92E-08       | 2.74               |
| Srpk2              | serine arginine-rich protein specific kinase 2                 | NM_009274     | 1.21E-09       | 1.97               |
| Sry                | sex determining region of Chr Y                                | NM_011564     | 0.0002709      | -2.01              |
| Ssbp2              | single-stranded DNA binding protein 2                          | NM_024186     | 4.22E-09       | 2.02               |
| Sst                | somatostatin                                                   | NM_009215     | 8.03E-11       | 19.55              |
| St6gal2            | beta galactoside alpha 2,6 sialyltransferase 2                 | NM_172829     | 1.23E-08       | 4.38               |
| St6galnac5         | ST6 (alpha-N-acetyl-neuraminyl-2,3-beta-galactosyl-1,3)-N-ac-5 | NM_012028     | 4.11E-05       | 2.06               |
| St8sia1            | ST8 alpha-N-acetyl-neuraminide alpha-2,8-sialyltransferase 1   | NM_011374     | 1.57E-08       | 3.01               |
| St8sia3            | ST8 alpha-N-acetyl-neuraminide alpha-2,8-sialyltransferase 3   | NM_009182     | 2.24E-09       | 3.22               |
| Stk32c             | serine threonine kinase 32C                                    | NM_001162540  | 3.58E-06       | 1.99               |
| Stmn1              | stathmin 1                                                     | NM_019641     | 5.31E-10       | 6.72               |
| Stmn2              | stathmin-like 2                                                | NM_025285     | 1.81E-09       | 3.96               |
| Stmn3              | stathmin-like 3                                                | NM_009133     | 1.47E-09       | 4.49               |
| Stmn4              | stathmin-like 4                                                | NM_019675     | 1.86E-07       | 2.31               |
| Stox2              | storkhead box 2                                                | NM_001114311  | 1.29E-07       | 4.88               |
| Stox2              | storkhead box 2                                                | NM_001114311  | 1.03E-05       | 1.84               |
| Strbp              | spermatid perinuclear RNA binding protein                      | NM_009261     | 2.28E-07       | 2.81               |
| Strip2             | striatin interacting protein 2                                 | NM_001037740  | 3.36E-06       | 2.40               |
| Stx1b              | syntaxin 1B                                                    | NM_024414     | 2.61E-11       | 5.48               |
| Stxbp1             | syntaxin binding protein 1                                     | NM_001113569  | 9.90E-12       | 4.71               |
| Stxbp5l            | syntaxin binding protein 5-like                                | NM_001114611  | 2.20E-06       | 2.18               |
| Sult4a1            | sulfotransferase family 4A, member 1                           | NM_013873     | 6.39E-10       | 4.78               |
| Susd4              | sushi domain containing 4                                      | NM_144796     | 7.45E-09       | 5.82               |
| Sv2a               | synaptic vesicle glycoprotein 2 a                              | NM_022030     | 2.00E-10       | 8.24               |
| Sv2b               | synaptic vesicle glycoprotein 2 b                              | NM_001109753  | 1.35E-08       | 6.00               |
| Sv2c               | synaptic vesicle glycoprotein 2c                               | NM_029210     | 6.07E-08       | 3.64               |
| Svop               | SV2 related protein                                            | NM_026805     | 4.22E-07       | 2.87               |
| Syn1               | synapsin I                                                     | NM_001110780  | 1.17E-09       | 4.43               |
| Syndig1            | synapse differentiation inducing 1                             | NM_001085521  | 1.78E-05       | 2.18               |
| Syngap1            | synaptic Ras GTPase activating protein 1 homolog (rat)         | NM_001281491  | 1.19E-07       | 7.17               |
| Syng1              | synaptogyrin 1                                                 | NM_009303     | 1.17E-08       | 1.97               |
| Syng3              | synaptogyrin 3                                                 | NM_011522     | 3.67E-09       | 4.07               |
| Synj1              | synaptojanin 1                                                 | NM_001045515  | 1.42E-09       | 2.49               |
| Syp                | synaptophysin                                                  | NM_009305     | 4.80E-11       | 3.58               |
| Syt1               | synaptotagmin I                                                | NM_001252341  | 2.90E-10       | 4.58               |
| Syt10              | synaptotagmin X                                                | NM_018803     | 0.0001897      | 2.08               |
| Syt11              | synaptotagmin XI                                               | NM_018804     | 1.42E-11       | 6.24               |

**S3 Table: Differential changes in adrenal gene expression in ASP+CGP treated mice relative to ASP diet mice ( $\geq\pm 1.8$  fold change,  $p < 0.05$ ).**

| <i>Gene symbol</i> | <i>Gene name</i>                                                    | <i>RefSeq</i> | <i>P-value</i> | <i>Fold Change</i> |
|--------------------|---------------------------------------------------------------------|---------------|----------------|--------------------|
| Syt13              | synaptotagmin XIII                                                  | NM_030725     | 3.11E-05       | 2.16               |
| Syt3               | synaptotagmin III                                                   | NM_001114116  | 7.65E-08       | 1.84               |
| Syt4               | synaptotagmin IV                                                    | NM_009308     | 1.56E-06       | 2.03               |
| Syt5               | synaptotagmin V                                                     | NM_016908     | 4.46E-10       | 3.94               |
| Syt9               | synaptotagmin IX                                                    | NM_021889     | 1.48E-06       | 1.88               |
| Szt2               | seizure threshold 2                                                 | NM_198170     | 7.03E-08       | -1.88              |
| Tac1               | tachykinin 1                                                        | NM_009311     | 5.99E-10       | 6.32               |
| Tac2               | tachykinin 2                                                        | NM_001199971  | 1.87E-08       | 5.84               |
| Tagln3             | transgelin 3                                                        | NM_019754     | 9.15E-10       | 4.93               |
| Tanc2              | tetratricopeptide repeat, ankyrin repeat and coiled-coil 2          | XM_006534482  | 4.00E-08       | 2.63               |
| Tasp1              | taspase, threonine aspartase 1                                      | NM_001159640  | 1.66E-05       | 1.81               |
| Tbc1d30            | TBC1 domain family, member 30                                       | NM_029057     | 2.74E-06       | 2.01               |
| Tbc1d9             | TBC1 domain family, member 9                                        | NM_001111304  | 4.43E-08       | 1.87               |
| Tceal3             | transcription elongation factor A (SII)-like 3                      | NM_001029978  | 5.92E-08       | 2.08               |
| Tekt5              | tektin 5                                                            | NM_001099275  | 6.60E-07       | 2.97               |
| Tenm1              | teneurin transmembrane protein 1                                    | NM_011855     | 5.37E-09       | 2.80               |
| Tenm2              | teneurin transmembrane protein 2                                    | NM_001290702  | 1.02E-07       | 2.69               |
| Tenm3              | teneurin transmembrane protein 3                                    | NM_001145937  | 1.24E-06       | 2.54               |
| Thra               | thyroid hormone receptor alpha                                      | NM_178060     | 2.25E-09       | 2.20               |
| Thy1               | thymus cell antigen 1, theta                                        | NM_009382     | 3.21E-09       | 5.16               |
| Timp4              | tissue inhibitor of metalloproteinase 4                             | NM_080639     | 5.71E-07       | 3.28               |
| Tle4               | transducin-like enhancer of split 4, homolog of Drosophila E        | NM_011600     | 1.22E-06       | 1.82               |
| Tmc7               | transmembrane channel-like gene family 7                            | NM_172476     | 6.24E-06       | 2.13               |
| Tmcc2              | transmembrane and coiled-coil domains 2                             | NM_178874     | 1.64E-08       | 2.33               |
| Tmeff1             | transmembrane protein with EGF-like and two follistatin-like        | NM_021436     | 3.04E-09       | 3.35               |
| Tmeff2             | transmembrane protein with EGF-like and two follistatin-like domain | NM_019790     | 9.86E-08       | 1.86               |
| Tmem130            | transmembrane protein 130                                           | NM_177735     | 7.25E-09       | 4.18               |
| Tmem145            | transmembrane protein 145                                           | NM_183311     | 6.99E-07       | 2.07               |
| Tmem150c           | transmembrane protein 150C                                          | NM_182841     | 4.05E-07       | 2.27               |
| Tmem163            | transmembrane protein 163                                           | NM_028135     | 1.77E-05       | 2.05               |
| Tmem178b           | transmembrane protein 178B                                          | NM_001004182  | 1.51E-07       | 3.17               |
| Tmem179            | transmembrane protein 179                                           | NM_178915     | 2.49E-07       | 2.16               |
| Tmem213            | transmembrane protein 213                                           | NM_029921     | 0.0008157      | -1.86              |
| Tmem217            | transmembrane protein 217                                           | NM_001162901  | 0.000313       | -1.83              |
| Tmem229a           | transmembrane protein 229A                                          | NM_177013     | 5.41E-08       | 3.71               |
| Tmem246            | transmembrane protein 246                                           | NM_025944     | 2.72E-09       | 2.66               |
| Tmem38a            | transmembrane protein 38A                                           | NM_144534     | 3.83E-08       | 2.36               |
| Tmem38b            | transmembrane protein 38B                                           | NM_028053     | 2.26E-07       | -3.56              |
| Tmem47             | transmembrane protein 47                                            | NM_138751     | 4.92E-09       | 2.01               |
| Tmem59l            | transmembrane protein 59-like                                       | NM_182991     | 3.03E-07       | 2.01               |
| Tmem63c            | transmembrane protein 63c                                           | NM_172583     | 7.18E-09       | 2.37               |
| Tmem88b            | transmembrane protein 88B                                           | NM_001033394  | 4.84E-06       | 3.71               |
| Tmem91             | transmembrane protein 91                                            | NM_001290497  | 2.29E-05       | 2.74               |
| Tmod2              | tropomodulin 2                                                      | NM_001038710  | 5.21E-09       | 3.12               |
| Tmx4               | thioredoxin-related transmembrane protein 4                         | NM_029148     | 3.96E-08       | 2.37               |
| Tnfaip6            | tumor necrosis factor alpha induced protein 6                       | NM_009398     | 1.66E-06       | 2.04               |
| Tnfrsf21           | tumor necrosis factor receptor superfamily, member 21               | NM_178589     | 5.03E-09       | 3.81               |
| Tnik               | TRAF2 and NCK interacting kinase                                    | NM_001163007  | 3.78E-07       | 2.22               |
| Tnk2               | tyrosine kinase, non-receptor, 2                                    | NM_001110147  | 2.92E-07       | 1.91               |
| Tnr                | tenascin R                                                          | NM_022312     | 5.22E-08       | 2.75               |
| Tpgs2              | tubulin polyglutamylase complex subunit 2                           | NM_001004361  | 2.75E-10       | 2.40               |

**S3 Table: Differential changes in adrenal gene expression in ASP+CGP treated mice relative to ASP diet mice ( $\geq\pm 1.8$  fold change,  $p < 0.05$ ).**

| <i>Gene symbol</i> | <i>Gene name</i>                                                | <i>RefSeq</i> | <i>P-value</i> | <i>Fold Change</i> |
|--------------------|-----------------------------------------------------------------|---------------|----------------|--------------------|
| Tppp               | tubulin polymerization promoting protein                        | NM_182839     | 9.20E-09       | 3.95               |
| Tppp3              | tubulin polymerization-promoting protein family member 3        | NM_026481     | 8.57E-10       | 2.15               |
| Trdn               | triadin                                                         | NM_029726     | 0.0003912      | -1.89              |
| Trh                | thyrotropin releasing hormone                                   | NM_009426     | 1.91E-08       | 4.60               |
| Tril               | TLR4 interactor with leucine-rich repeats                       | NM_025817     | 9.68E-08       | 1.90               |
| Trim2              | tripartite motif-containing 2                                   | NM_001271725  | 3.64E-07       | 2.14               |
| Trim32             | tripartite motif-containing 32                                  | NM_001161782  | 9.43E-08       | 2.41               |
| Trim37             | tripartite motif-containing 37                                  | NM_197987     | 3.05E-08       | 2.41               |
| Trim66             | tripartite motif-containing 66                                  | NM_001170912  | 6.35E-06       | 1.84               |
| Trim9              | tripartite motif-containing 9                                   | NM_001286387  | 1.47E-10       | 5.15               |
| Tro                | trophinin                                                       | NM_001002272  | 1.95E-07       | 1.80               |
| Trpc1              | transient receptor potential cation channel, subfamily C1       | NM_011643     | 2.78E-09       | 2.53               |
| Trpm3              | transient receptor potential cation channel, subfamily M        | NM_001035239  | 2.96E-07       | 1.98               |
| Tspan13            | tetraspanin 13                                                  | NM_025359     | 2.53E-08       | 2.47               |
| Tspan2             | tetraspanin 2                                                   | NM_001243132  | 1.64E-06       | 2.28               |
| Tspan7             | tetraspanin 7                                                   | NM_019634     | 3.41E-10       | 2.42               |
| Tspyl2             | TSPY-like 2                                                     | NM_029836     | 1.62E-07       | 1.94               |
| Tspyl4             | TSPY-like 4                                                     | NM_030203     | 2.89E-11       | 3.86               |
| Ttbk2              | tau tubulin kinase 2                                            | NM_001024856  | 8.45E-07       | 1.83               |
| Ttc3               | tetratricopeptide repeat domain 3                               | NM_009441     | 1.07E-08       | 2.25               |
| Ttc9               | tetratricopeptide repeat domain 9                               | NM_001033149  | 2.75E-07       | 3.44               |
| Ttl1               | tubulin tyrosine ligase-like 1                                  | NM_178869     | 6.25E-07       | 2.37               |
| Ttl7               | tubulin tyrosine ligase-like family, member 7                   | NM_027594     | 2.76E-07       | 2.35               |
| Ttyh1              | tweety homolog 1 (Drosophila)                                   | NM_001001454  | 6.87E-11       | 11.71              |
| Tuba1a             | tubulin, alpha 1A                                               | NM_011653     | 1.42E-07       | 2.87               |
| Tuba4a             | tubulin, alpha 4A                                               | NM_009447     | 1.38E-08       | 2.46               |
| Tubb2a             | tubulin, beta 2A class IIA                                      | NM_009450     | 1.23E-08       | 3.86               |
| Tubb2b             | tubulin, beta 2B class IIB                                      | NM_023716     | 3.03E-08       | 4.05               |
| Tubb3              | tubulin, beta 3 class III                                       | NM_023279     | 2.18E-07       | 4.22               |
| Tubb4a             | tubulin, beta 4A class IVA                                      | NM_009451     | 2.02E-14       | 11.69              |
| Tubg2              | tubulin, gamma 2                                                | NM_134028     | 2.87E-06       | 2.62               |
| Tulp4              | tubby like protein 4                                            | NM_001103181  | 3.51E-07       | 2.12               |
| Tvp23a             | trans-golgi network vesicle protein 23A                         | NM_001013778  | 1.78E-07       | 2.31               |
| Ube2o              | ubiquitin-conjugating enzyme E2O                                | NM_173755     | 9.07E-06       | 1.86               |
| Ube2ql1            | ubiquitin-conjugating enzyme E2Q family-like 1                  | NM_001145162  | 8.08E-11       | 6.58               |
| Ubqln2             | ubiquilin 2                                                     | NM_018798     | 1.12E-07       | 1.90               |
| Uchl1              | ubiquitin carboxy-terminal hydrolase L1                         | NM_011670     | 5.64E-09       | 2.04               |
| Ugt8a              | UDP galactosyltransferase 8A                                    | NM_011674     | 3.55E-06       | 2.19               |
| Unc13a             | unc-13 homolog A (C. elegans)                                   | NM_001029873  | 1.42E-06       | 1.93               |
| Unc13c             | unc-13 homolog C (C. elegans)                                   | NM_001081153  | 3.53E-08       | 5.16               |
| Unc79              | unc-79 homolog (C. elegans)                                     | NM_001081017  | 3.85E-07       | 1.90               |
| Unc80              | unc-80 homolog (C. elegans)                                     | NM_175510     | 9.88E-08       | 3.12               |
| Usp11              | ubiquitin specific peptidase 11                                 | NM_145628     | 1.03E-06       | 1.94               |
| Usp22              | ubiquitin specific peptidase 22                                 | NM_001004143  | 2.49E-07       | 1.82               |
| Usp29              | ubiquitin specific peptidase 29                                 | NM_001290994  | 7.07E-06       | 2.46               |
| Usp46              | ubiquitin specific peptidase 46                                 | NM_177561     | 5.01E-06       | 1.92               |
| Utp14b             | UTP14, U3 small nucleolar ribonucleoprotein, homolog B          | NM_001001981  | 4.30E-07       | 2.32               |
| Vamp1              | vesicle-associated membrane protein 1                           | NM_001080557  | 7.99E-08       | 2.98               |
| Vat1l              | vesicle amine transport protein 1 homolog-like (T. californica) | NM_173016     | 3.10E-08       | 3.03               |
| Vgf                | VEGF nerve growth factor inducible                              | NM_001039385  | 1.19E-06       | 1.98               |
| Vsnl1              | visinin-like 1                                                  | NM_012038     | 1.94E-08       | 3.13               |

**S3 Table: Differential changes in adrenal gene expression in ASP+CGP treated mice relative to ASP diet mice ( $\geq\pm 1.8$  fold change,  $p < 0.05$ ).**

| <i>Gene symbol</i> | <i>Gene name</i>                                         | <i>RefSeq</i> | <i>P-value</i> | <i>Fold Change</i> |
|--------------------|----------------------------------------------------------|---------------|----------------|--------------------|
| Vstm2a             | V-set and transmembrane domain containing 2A             | NM_001290539  | 6.62E-09       | 15.44              |
| Vstm2b             | V-set and transmembrane domain containing 2B             | NM_021387     | 1.35E-06       | 1.96               |
| Vtn                | vitronectin                                              | NM_011707     | 4.36E-08       | 2.45               |
| Vwc2l              | von Willebrand factor C domain-containing protein 2-like | NM_177164     | 6.63E-06       | 1.87               |
| Wasf1              | WAS protein family, member 1                             | NM_031877     | 1.98E-07       | 2.93               |
| Wdr17              | WD repeat domain 17                                      | NM_001172152  | 1.41E-06       | 2.14               |
| Wdr47              | WD repeat domain 47                                      | NM_181400     | 2.79E-07       | 2.49               |
| Wdr7               | WD repeat domain 7                                       | NM_001014981  | 1.04E-08       | 1.90               |
| Wnk1               | WNK lysine deficient protein kinase 1                    | NM_001199083  | 7.95E-06       | 2.04               |
| Wnk2               | WNK lysine deficient protein kinase 2                    | NM_001290311  | 1.92E-07       | 2.36               |
| Wscd1              | WSC domain containing 1                                  | NM_177618     | 5.55E-06       | 1.85               |
| Zcchc12            | zinc finger, CCHC domain containing 12                   | NM_028325     | 2.86E-08       | 4.51               |
| Zcchc18            | zinc finger, CCHC domain containing 18                   | NM_001035509  | 6.13E-07       | 2.36               |
| Zcchc24            | zinc finger, CCHC domain containing 24                   | NM_001101433  | 6.23E-07       | 1.93               |
| Zdhhc2             | zinc finger, DHHC domain containing 2                    | NM_178395     | 1.92E-05       | 2.19               |
| Zdhhc22            | zinc finger, DHHC-type containing 22                     | NM_001080943  | 2.20E-09       | 3.49               |
| Zdhhc23            | zinc finger, DHHC domain containing 23                   | NM_001007460  | 0.0005871      | 1.87               |
| Zfp365             | zinc finger protein 365                                  | NM_178679     | 1.64E-08       | 2.68               |
| Zfp385a            | zinc finger protein 385A                                 | NM_013866     | 7.79E-07       | 1.88               |
| Zfp385b            | zinc finger protein 385B                                 | NM_178723     | 2.52E-05       | 2.06               |
| Zfp385c            | zinc finger protein 385C                                 | NM_177790     | 2.49E-05       | -1.87              |
| Zfp804a            | zinc finger protein 804A                                 | NM_175513     | 3.02E-07       | 2.63               |
| Zfp941             | zinc finger protein 941 E197E1:E243                      | NM_001001180  | 2.19E-05       | 1.84               |
| Zic1               | zinc finger protein of the cerebellum 1                  | NM_009573     | 1.85E-08       | 4.26               |
| Zic2               | zinc finger protein of the cerebellum 2                  | NM_009574     | 7.17E-07       | 4.02               |
| Zkscan16           | zinc finger with KRAB and SCAN domains 16                | NM_001099323  | 1.99E-07       | 2.86               |
| Zmat4              | zinc finger, matrin type 4                               | NM_001277239  | 9.35E-09       | 2.31               |
| Zwint              | ZW10 interactor                                          | NM_001293683  | 2.35E-12       | 2.83               |
| Zyg11b             | zyg-II family member B, cell cycle regulator             | NM_001033634  | 2.75E-06       | 2.01               |
